# Supplementary material for: Small-molecule screen reveals pathways that regulate C4 secretion in stem cell-derived astrocytes
Source: PubMed Central journal article supplement — Stem Cell Reports. 2022 Dec 22;18(1):237–53. doi: 10.1016/j.stemcr.2022.11.018 (PMC9860128; doi:10.1016/j.stemcr.2022.11.018), 2022-12-22
Supplement: mmc1.pdf [file mmc1.pdf]

**Supplemental Information**

**Small-molecule screen reveals pathways that regulate C4 secretion in stem cell-derived astrocytes**

**Francesca Rapino, Ted Natoli, Francesco Limone, Erin O'Connor, Jack Blank, Matthew Tegtmeier, William Chen, Erika Norabuena, Juhi Narula, Dane Hazelbaker, Gabriella Angelini, Lindy Barrett, Alison O'Neil, Ursula K. Beattie, Jessica M. Thanos, Heather de Rivera, Steven D. Sheridan, Roy H. Perlis, Steven A. McCarroll, Beth Stevens, Aravind Subramanian, Ralda Nehme, and Lee L. Rubin**

Supplementary information

Figure S1

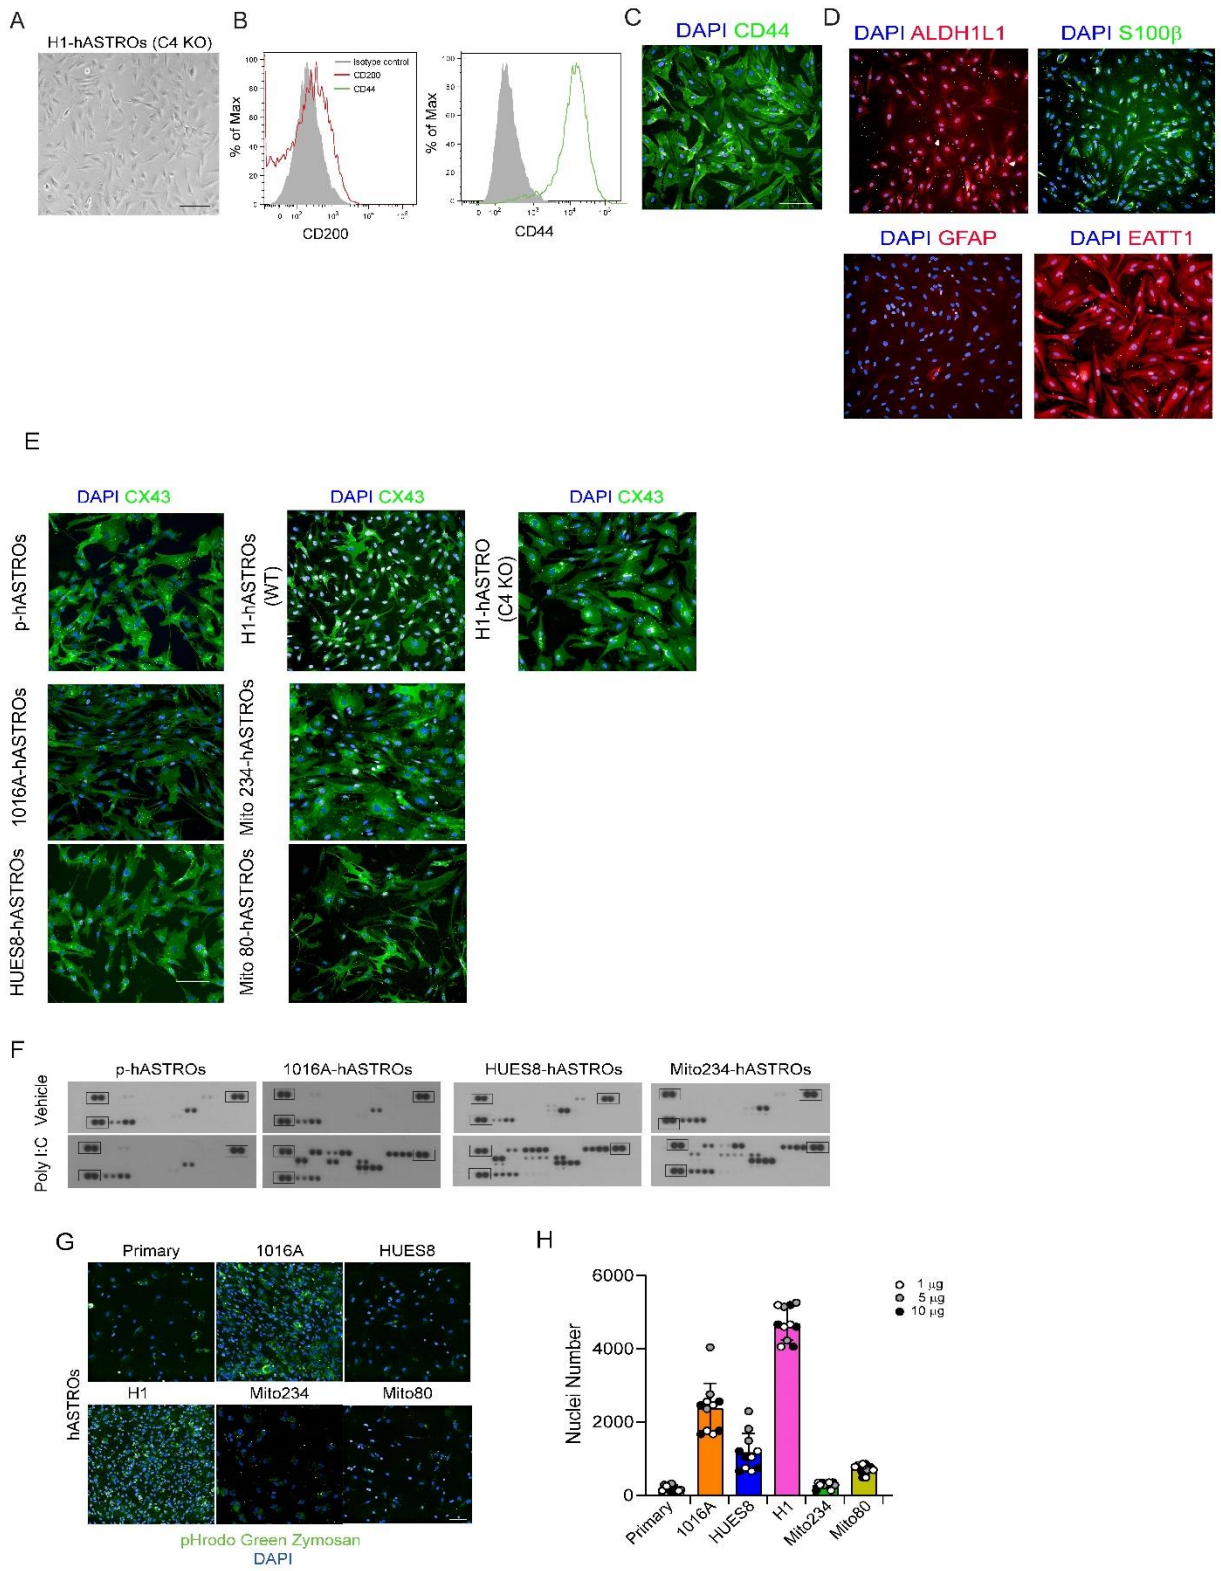

**Figure S1. Related to Figure 1. Differentiation and characterization of stem cell-derived astrocytes compared to primary human fetal astrocytes (p-hASTROs).**

(A) Bright-field image of H1 C4 KO hASTROs. (Scale bar, 100  $\mu$ m). (B) Flow-cytometer analysis of astrocytes stained for neuronal marker CD200 (red), astrocyte-specific antigen CD44 (green), and relative isotype controls (grey). (C) Immunocytochemistry of CD44 in H1 C4 KO hASTROs. (D) Representative immunocytochemistry using antibodies against ALDH1L1, S100 $\beta$ , GFAP and EATT1 in H1 C4 KO hASTROs. (E) Immunocytochemistry of CX43 in p-ASTROs and iPSCs and ESCs derived-hASTROs. (F) Dot blot of cytokine arrays in Fig. 1F. (G) Representative images of pHrodo Green Zymosan beads after engulfment in p-ASTROs, iPSCs- and ESCs- derived hASTROs. (H) Nuclei number of replicate wells for data shown in Figure 1G. n=9 field per well acquired. Each symbol represents the sum of nuclei number per well. Each color represents a different treatment (1, 5 or 10  $\mu$ g) of pHrodo Green Zymosan particles.

Figure S2

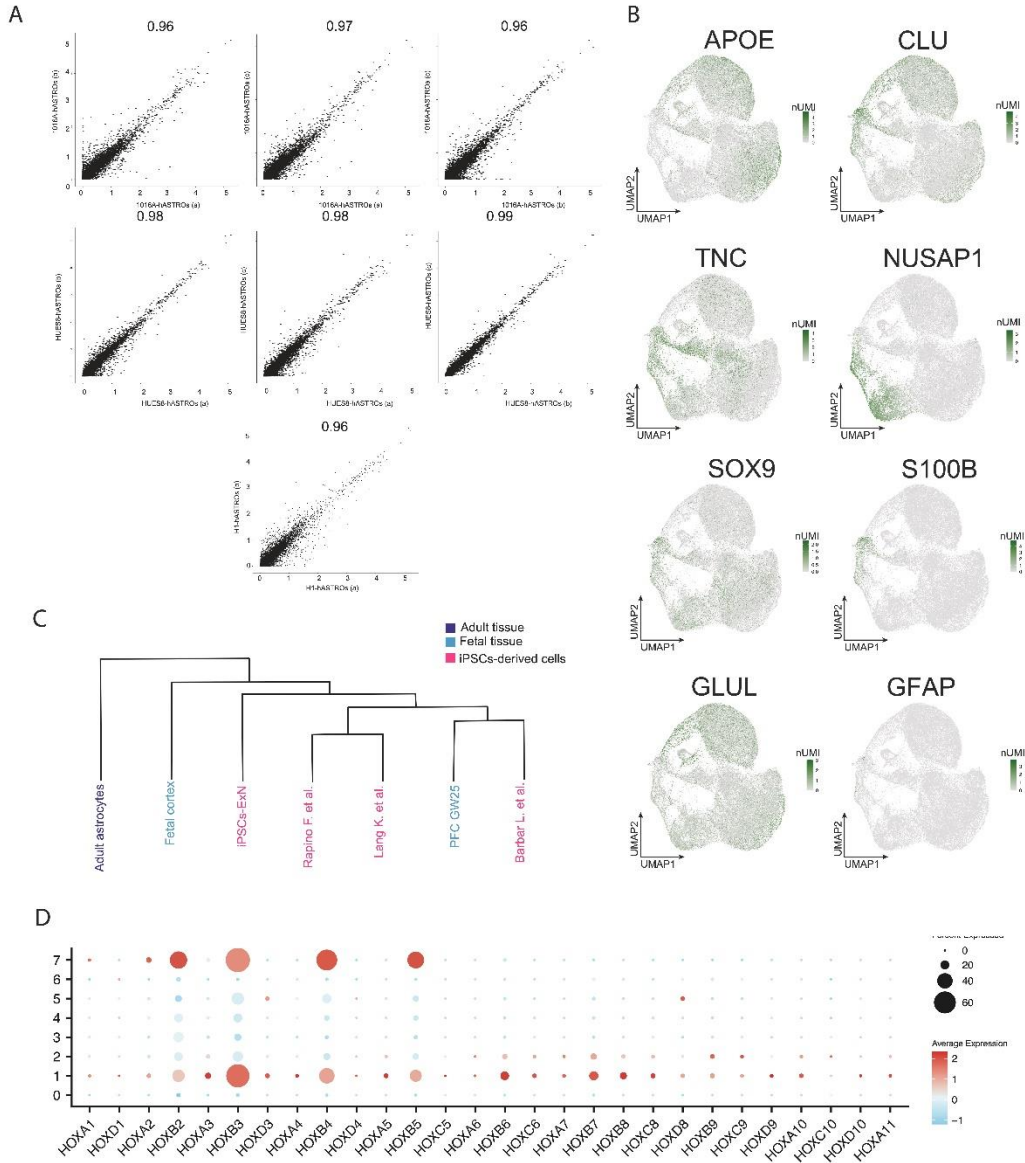

Figure S2. Related to Figure 2. **Transcriptional analysis of h-ASTROs: robustness of the differentiation protocol and regionality of the differentiated population.**

(A) Gene expression correlation between each cell line and each replicate per line. (B) UMAP projection representing markers associated with astrocyte maturation. (C) Hierarchical clustering of hASTROs and primary human astrocytes, fetal cortex and iPSC-derived astrocytes using different differentiation methods. (D) Dot plot for gene expression of all HOX genes detected in 8 astrocyte subgroups.

Figure 3 supp

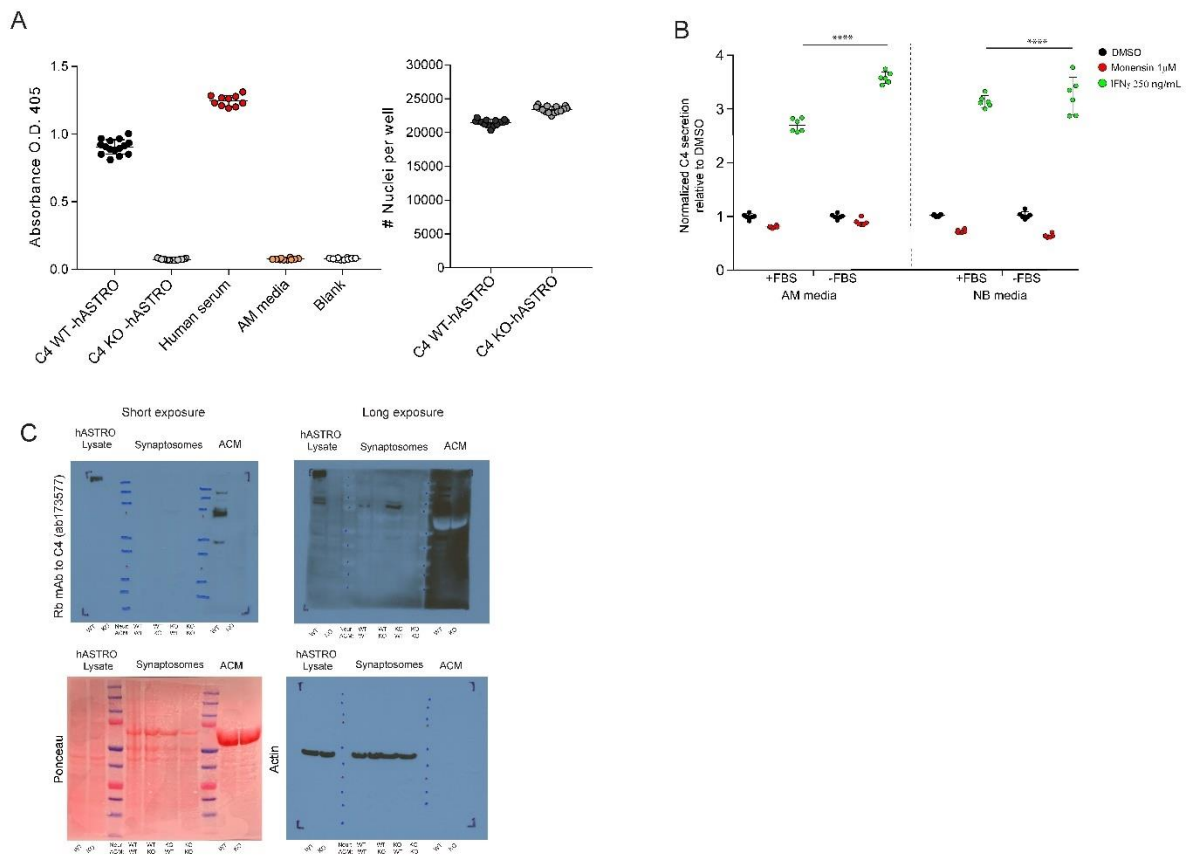

Figure S3. Related to Figure 3. **Validation of C4 secretion in different media conditions and using H1 C4 KO.**

(A) ELISA performed using C4 KO-hASTROs compared to C4 WT-hASTROs. Human serum (containing complement) was used as a positive control. Astrocyte Medium (AM) was used as a negative control. The right panel shows the number of nuclei in wells quantified in the ELISA. (B) C4 secretion in 1016A-hASTROs, cultured in different media with or without fetal bovine serum (FBS) and treated with monensin and IFN $\gamma$ . AM=Astrocyte medium; NB=Neurobasal medium. Data are represented as mean of technical replicate wells (n=6, per condition)  $\pm$  SD Two-way ANOVA \*\*\*\*p>0.0001. (C) Unprocessed Western blot films and membranes from Fig. 2D stained with C4, Ponceau and Actin.

Figure S4

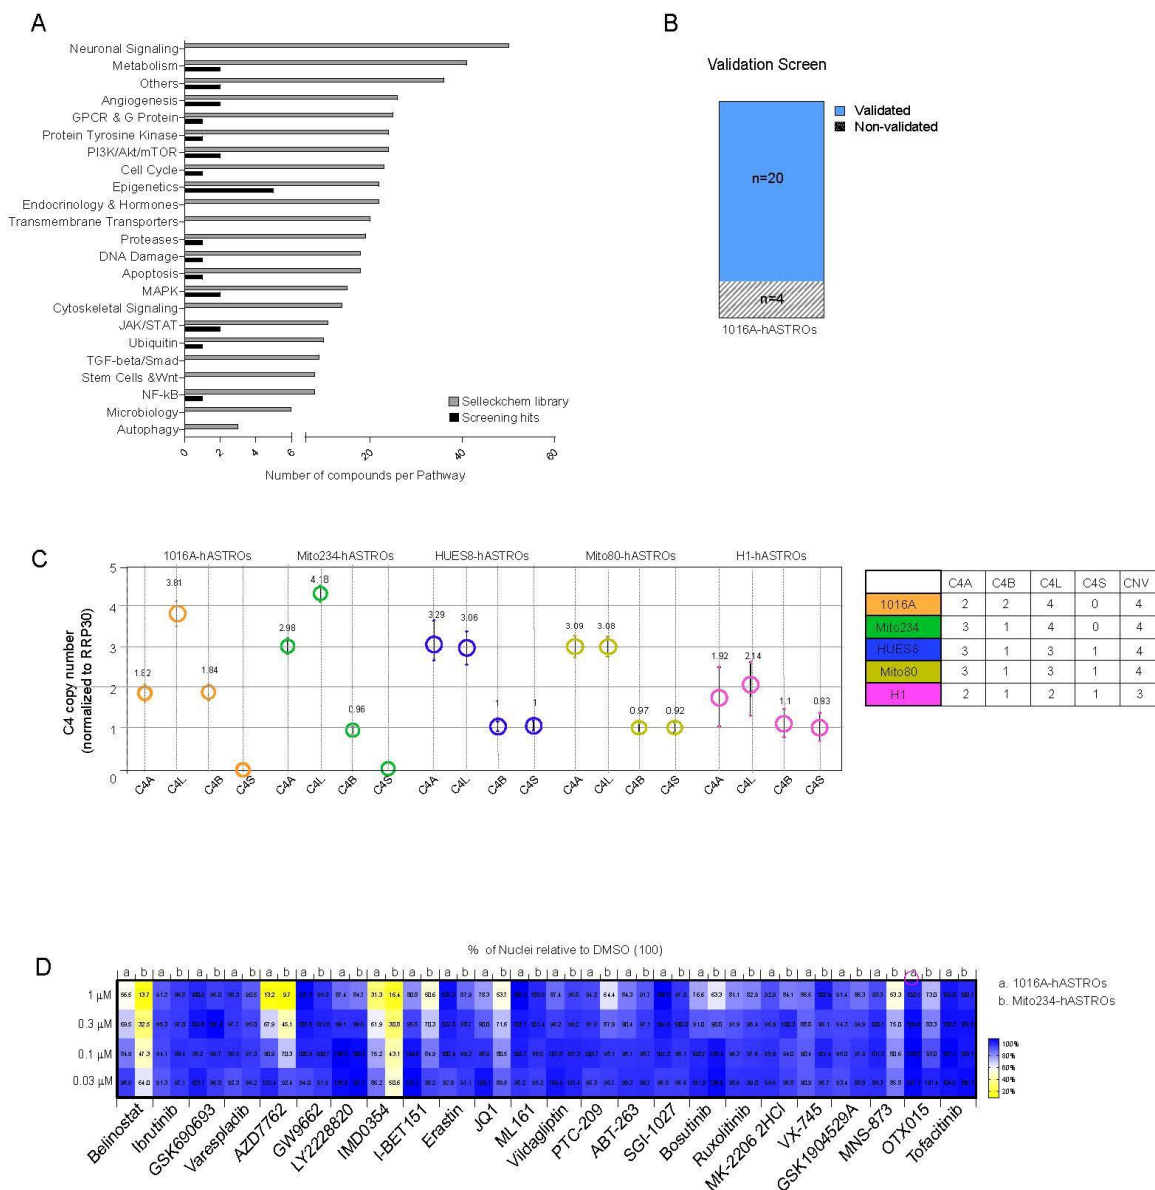

Figure S4. Related to Figure 5. **Primary screening analysis and secondary screening validation.** (A) The bar graph shows the selected screening hits (black bars) and the content of the compounds in the Selleck Chemicals library organized by annotated pathways (grey bars). (B) Summary of validated hits in secondary screening performed on 1016A-hASTROs. Graph shows the number of validated and non-validated compounds. (C) Chart showing the total copy number and the different forms of C4 (C4A, C4B, C4L, and C4S) in 5 stem cell lines used for astrocyte differentiation. Right panel summarizes the total copy number variation of C4. (D) Nuclei number of the 1016A- and Mito234-hASTROs treated with 24 selected compounds at different concentrations, compared to DMSO treated cells (set at 100%).

Figure S5

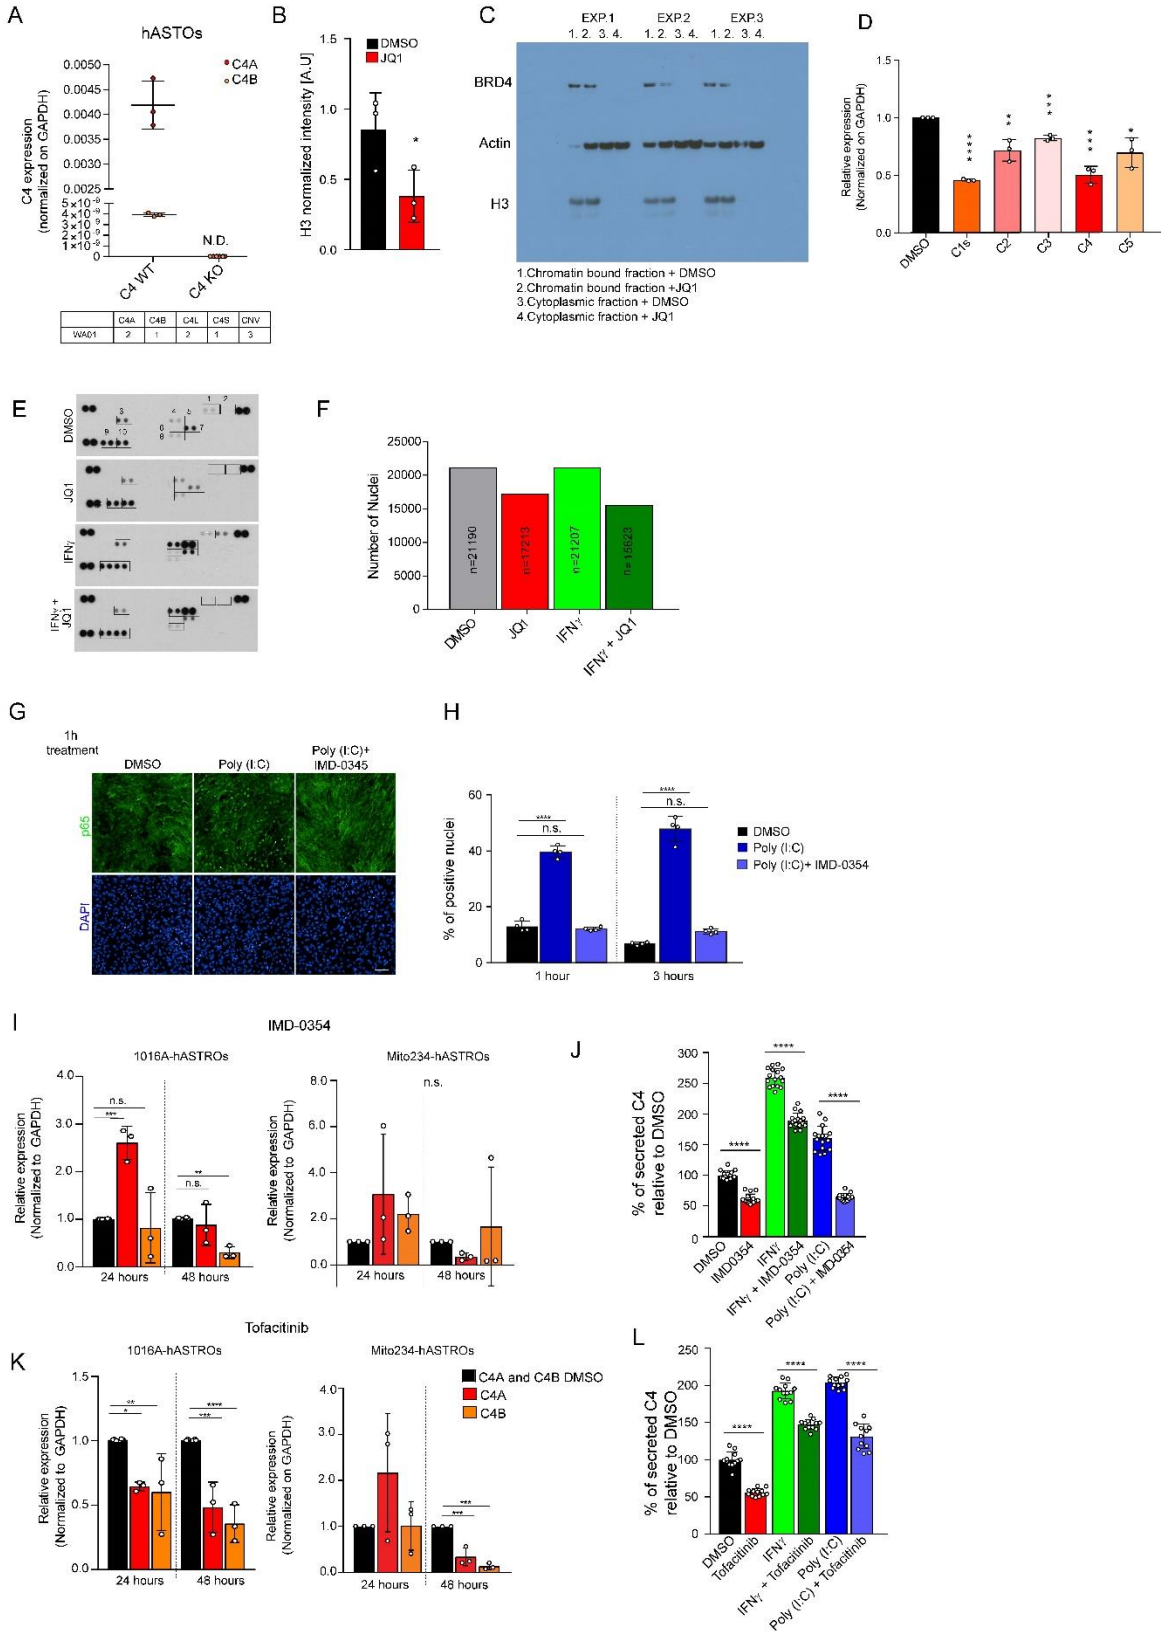

Figure S5. Related to Figure 5. **Effects of JQ1, IMD-0354, and Tofacitinib on C4 mRNA and secretion.**

(A) Specificity of TaqMan probes for C4A and C4B assessed using the C4 KO-hASTRO line. The table below shows the copy number variation of C4 in the H1 cell line used to generate the KO. (B) Bar graph quantifies BRD4 on the chromatin fraction after treatment of biological triplicates with DMSO or JQ1. Unpaired t-test,  $*p < 0.01$ . (C) Unprocessed Western blot film of Fig. 3B. Western blot was run on triplicate experiments (EXP1, EXP2 and EXP3) and stained for BRD4, Actin and H3 to label the chromatin and cytoplasmic fractions. (D) qPCR expression of different complement components (including total C4) in biological triplicates of 1016A-hASTROs treated with JQ1. Unpaired t-test,  $*p < 0.01$ ,  $**p \leq 0.001$ ,  $***p < 0.0001$ ,  $****p \leq 0.0001$ . (E) Dot blots of human cytokine profile quantified in Fig. 3D. Unlabeled dots are positive technical controls. Numbered rectangles represent different cytokines quantified. (F) Total nuclei number of astrocytes used for the detection of cytokines in Fig. 5D. (G) Representative images of NF- $\kappa$ B p65 immunostaining in astrocytes treated with poly(I:C) alone or in combination with IMD-0354. Scale bar 100  $\mu$ M. (H) Quantification of the percent of p65-positive nuclei after one or three hours of treatment in technical replicates. One-way ANOVA, comparing treatment to DMSO  $****p \leq 0.0001$ . (I) C4A and C4B mRNA expression of biological triplicates of 1016A and Mito234-hASTROs treated with IMD-0354 for 24 or 48 hours. One-way ANOVA,  $**p \leq 0.001$ ,  $***p < 0.0001$ , n.s.=non-significant. (J) ELISA of secreted C4 in 1016A-hASTROs treated with the NF- $\kappa$ B inhibitor with or without IFN $\gamma$  or poly(I:C). Data are presented as mean of technical replicates  $\pm$  SD relative to DMSO control (100% secretion). Unpaired t-test  $****p < 0.0001$ . (K) C4A and C4B mRNA expression of biological triplicates of 1016A and Mito234-hASTROs treated with Tofacitinib for 24 or 48 hours. One-way ANOVA,  $*p < 0.01$ ,  $**p \leq 0.001$ ,  $***p < 0.0001$ ,  $****p \leq 0.0001$ , n.s.=non-significant. (L) ELISA of secreted C4 in 1016A-hASTROs treated with Tofacitinib with or without IFN $\gamma$  or poly(I:C). Data are presented as mean of technical replicates  $\pm$  SD relative to DMSO control (100% secretion). Unpaired t-test  $****p < 0.0001$ .



Figure S6

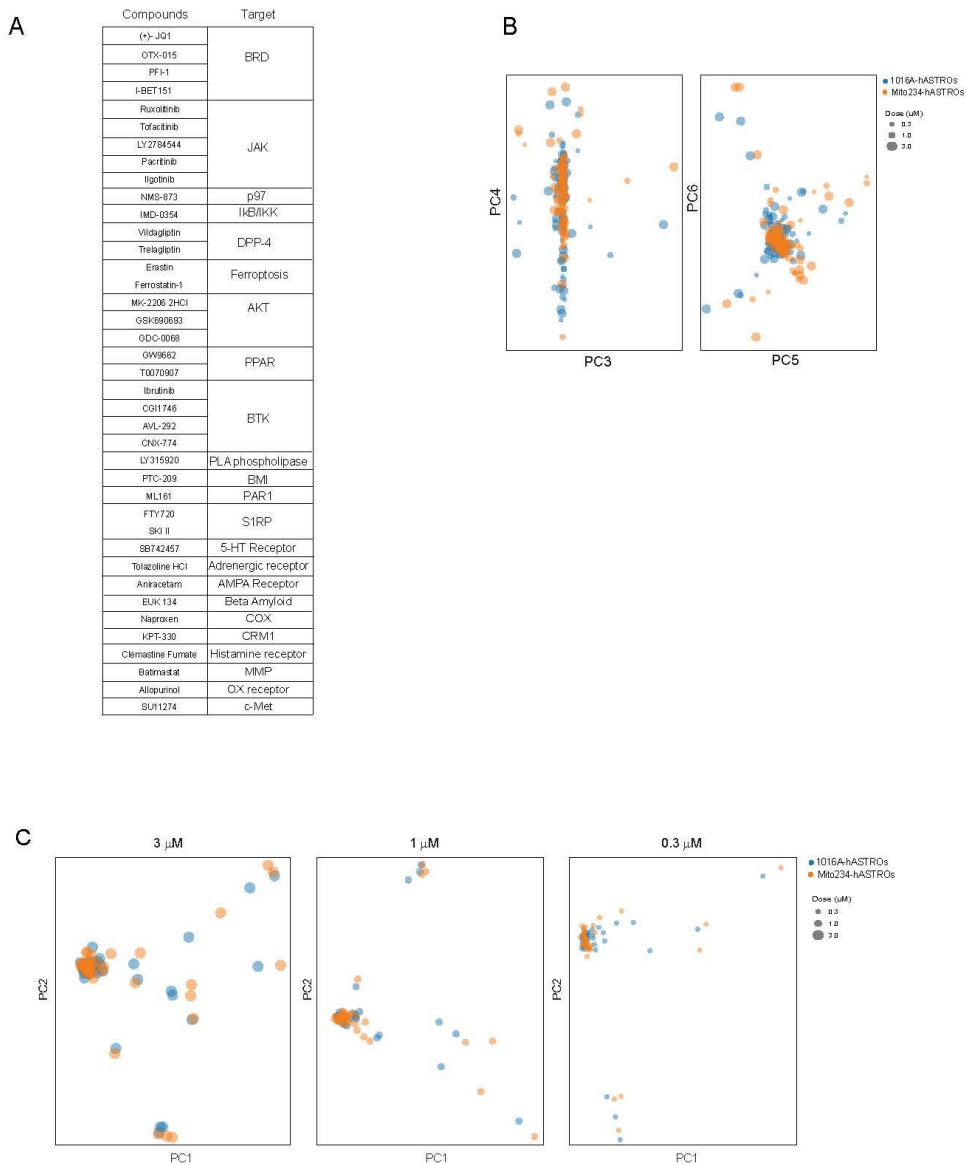

Figure S6. Related to Figure 6. **C4 connectivity through CMap analysis.**

(A) Table of selected compounds used for the CMap analysis. (B) PC3 vs. PC4 and PC5 vs. PC6 of healthy control (1016A-pASTROs) and patient cell line (Mito234-hASTROs) treated with selected compounds. Circles of different sizes represent different doses (0.3, 1, and 3  $\mu$ M). (C) PCA (PC 1 vs. PC2) of the two cell lines plotted per dose. PCA was performed on the data from each dose independently.

Table S1  
Statistics of Figure 3B

| Tukey's multiple comparisons test               | Mean Diff. | 95.00% CI of diff. | Below threshold? | Summary | Adjusted P Value |
|-------------------------------------------------|------------|--------------------|------------------|---------|------------------|
| H1 hASTROs DMSO vs. H1 hASTROs Monensin         | 25.42      | -75.46 to 126.3    | No               | ns      | >0.9999          |
| H1 hASTROs DMSO vs. H1 hASTROs IFNy             | -105.3     | -206.2 to -4.405   | Yes              | *       | 0.0304           |
| H1 hASTROs DMSO vs. Primary HA DMSO             | 1.181      | -103.8 to 106.2    | No               | ns      | >0.9999          |
| H1 hASTROs DMSO vs. Primary HA Monensin         | 38.18      | -69.36 to 145.7    | No               | ns      | 0.9988           |
| H1 hASTROs DMSO vs. Primary HA IFNy             | -124       | -229.0 to -18.95   | Yes              | **      | 0.0053           |
| H1 hASTROs DMSO vs. Mito80 hASTROs DMSO         | -43.71     | -133.5 to 46.05    | No               | ns      | 0.9633           |
| H1 hASTROs DMSO vs. Mito80 hASTROs Monensin     | 8.186      | -81.58 to 97.95    | No               | ns      | >0.9999          |
| H1 hASTROs DMSO vs. Mito80 hASTROs IFNy         | -233.7     | -323.5 to -143.9   | Yes              | ****    | <0.0001          |
| H1 hASTROs DMSO vs. Mito234 hASTROs DMSO        | -7.515     | -97.28 to 82.25    | No               | ns      | >0.9999          |
| H1 hASTROs DMSO vs. Mito 234 hASTROs Monensin   | 28.23      | -62.25 to 118.7    | No               | ns      | 0.9998           |
| H1 hASTROs DMSO vs. Mito 234 hASTROs IFNy       | -219.6     | -309.3 to -129.8   | Yes              | ****    | <0.0001          |
| H1 hASTROs DMSO vs. Hues8 hASTROs DMSO          | -7.23      | -96.99 to 82.53    | No               | ns      | >0.9999          |
| H1 hASTROs DMSO vs. Hues8 hASTROs Monensin      | 17.35      | -72.41 to 107.1    | No               | ns      | >0.9999          |
| H1 hASTROs DMSO vs. Hues8 hASTROs IFNy          | -103       | -192.7 to -13.19   | Yes              | **      | 0.0084           |
| H1 hASTROs DMSO vs. 1016A hASTROs DMSO          | -7.515     | -97.28 to 82.25    | No               | ns      | >0.9999          |
| H1 hASTROs DMSO vs. 1016A hASTROs Monensin      | 20.65      | -69.12 to 110.4    | No               | ns      | >0.9999          |
| H1 hASTROs DMSO vs. 1016A hASTROs IFNy          | -273.7     | -363.5 to -184.0   | Yes              | ****    | <0.0001          |
| H1 hASTROs Monensin vs. H1 hASTROs IFNy         | -130.7     | -231.6 to -29.83   | Yes              | ***     | 0.001            |
| H1 hASTROs Monensin vs. Primary HA DMSO         | -24.24     | -129.2 to 80.76    | No               | ns      | >0.9999          |
| H1 hASTROs Monensin vs. Primary HA Monensin     | 12.75      | -94.79 to 120.3    | No               | ns      | >0.9999          |
| H1 hASTROs Monensin vs. Primary HA IFNy         | -149.4     | -254.4 to -44.37   | Yes              | ***     | 0.0001           |
| H1 hASTROs Monensin vs. Mito80 hASTROs DMSO     | -69.13     | -158.9 to 20.63    | No               | ns      | 0.3792           |
| H1 hASTROs Monensin vs. Mito80 hASTROs Monensin | -17.24     | -107.0 to 72.52    | No               | ns      | >0.9999          |

|                                                   |        |                  |     |      |         |
|---------------------------------------------------|--------|------------------|-----|------|---------|
| H1 hASTROs Monensin vs. Mito80 hASTROs IFNy       | -259.1 | -348.9 to -169.4 | Yes | **** | <0.0001 |
| H1 hASTROs Monensin vs. Mito234 hASTROs DMSO      | -32.94 | -122.7 to 56.82  | No  | ns   | 0.9983  |
| H1 hASTROs Monensin vs. Mito 234 hASTROs Monensin | 2.807  | -87.67 to 93.28  | No  | ns   | >0.9999 |
| H1 hASTROs Monensin vs. Mito 234 hASTROs IFNy     | -245   | -334.8 to -155.2 | Yes | **** | <0.0001 |
| H1 hASTROs Monensin vs. Hues8 hASTROs DMSO        | -32.65 | -122.4 to 57.11  | No  | ns   | 0.9984  |
| H1 hASTROs Monensin vs. Hues8 hASTROs Monensin    | -8.073 | -97.83 to 81.69  | No  | ns   | >0.9999 |
| H1 hASTROs Monensin vs. Hues8 hASTROs IFNy        | -128.4 | -218.1 to -38.61 | Yes | ***  | 0.0001  |
| H1 hASTROs Monensin vs. 1016A hASTROs DMSO        | -32.94 | -122.7 to 56.82  | No  | ns   | 0.9983  |
| H1 hASTROs Monensin vs. 1016A hASTROs Monensin    | -4.777 | -94.54 to 84.98  | No  | ns   | >0.9999 |
| H1 hASTROs Monensin vs. 1016A hASTROs IFNy        | -299.2 | -388.9 to -209.4 | Yes | **** | <0.0001 |
| H1 hASTROs IFNy vs. Primary HA DMSO               | 106.5  | 1.466 to 211.5   | Yes | *    | 0.0428  |
| H1 hASTROs IFNy vs. Primary HA Monensin           | 143.5  | 35.92 to 251.0   | Yes | ***  | 0.0006  |
| H1 hASTROs IFNy vs. Primary HA IFNy               | -18.66 | -123.7 to 86.34  | No  | ns   | >0.9999 |
| H1 hASTROs IFNy vs. Mito80 hASTROs DMSO           | 61.58  | -28.18 to 151.3  | No  | ns   | 0.5995  |
| H1 hASTROs IFNy vs. Mito80 hASTROs Monensin       | 113.5  | 23.71 to 203.2   | Yes | **   | 0.0016  |
| H1 hASTROs IFNy vs. Mito80 hASTROs IFNy           | -128.4 | -218.2 to -38.64 | Yes | ***  | 0.0001  |
| H1 hASTROs IFNy vs. Mito234 hASTROs DMSO          | 97.77  | 8.011 to 187.5   | Yes | *    | 0.0175  |
| H1 hASTROs IFNy vs. Mito 234 hASTROs Monensin     | 133.5  | 43.04 to 224.0   | Yes | **** | <0.0001 |
| H1 hASTROs IFNy vs. Mito 234 hASTROs IFNy         | -114.3 | -204.0 to -24.52 | Yes | **   | 0.0014  |
| H1 hASTROs IFNy vs. Hues8 hASTROs DMSO            | 98.06  | 8.297 to 187.8   | Yes | *    | 0.0169  |
| H1 hASTROs IFNy vs. Hues8 hASTROs Monensin        | 122.6  | 32.88 to 212.4   | Yes | ***  | 0.0003  |
| H1 hASTROs IFNy vs. Hues8 hASTROs IFNy            | 2.336  | -87.43 to 92.10  | No  | ns   | >0.9999 |
| H1 hASTROs IFNy vs. 1016A hASTROs DMSO            | 97.77  | 8.011 to 187.5   | Yes | *    | 0.0175  |
| H1 hASTROs IFNy vs. 1016A hASTROs Monensin        | 125.9  | 36.17 to 215.7   | Yes | ***  | 0.0002  |
| H1 hASTROs IFNy vs. 1016A hASTROs IFNy            | -168.5 | -258.2 to -78.70 | Yes | **** | <0.0001 |

|                                                   |        |                  |     |      |         |
|---------------------------------------------------|--------|------------------|-----|------|---------|
| Primary HA DMSO vs. Primary HA Monensin           | 37     | -74.42 to 148.4  | No  | ns   | 0.9995  |
| Primary HA DMSO vs. Primary HA IFNy               | -125.1 | -234.1 to -16.17 | Yes | **   | 0.0082  |
| Primary HA DMSO vs. Mito80 hASTROs DMSO           | -44.89 | -139.3 to 49.48  | No  | ns   | 0.9705  |
| Primary HA DMSO vs. Mito80 hASTROs Monensin       | 7.006  | -87.36 to 101.4  | No  | ns   | >0.9999 |
| Primary HA DMSO vs. Mito80 hASTROs IFNy           | -234.9 | -329.2 to -140.5 | Yes | **** | <0.0001 |
| Primary HA DMSO vs. Mito234 hASTROs DMSO          | -8.696 | -103.1 to 85.67  | No  | ns   | >0.9999 |
| Primary HA DMSO vs. Mito 234 hASTROs Monensin     | 27.05  | -68.00 to 122.1  | No  | ns   | >0.9999 |
| Primary HA DMSO vs. Mito 234 hASTROs IFNy         | -220.8 | -315.1 to -126.4 | Yes | **** | <0.0001 |
| Primary HA DMSO vs. Hues8 hASTROs DMSO            | -8.41  | -102.8 to 85.96  | No  | ns   | >0.9999 |
| Primary HA DMSO vs. Hues8 hASTROs Monensin        | 16.17  | -78.20 to 110.5  | No  | ns   | >0.9999 |
| Primary HA DMSO vs. Hues8 hASTROs IFNy            | -104.1 | -198.5 to -9.765 | Yes | *    | 0.0147  |
| Primary HA DMSO vs. 1016A hASTROs DMSO            | -8.696 | -103.1 to 85.67  | No  | ns   | >0.9999 |
| Primary HA DMSO vs. 1016A hASTROs Monensin        | 19.47  | -74.90 to 113.8  | No  | ns   | >0.9999 |
| Primary HA DMSO vs. 1016A hASTROs IFNy            | -274.9 | -369.3 to -180.6 | Yes | **** | <0.0001 |
| Primary HA Monensin vs. Primary HA IFNy           | -162.1 | -273.5 to -50.71 | Yes | **** | <0.0001 |
| Primary HA Monensin vs. Mito80 hASTROs DMSO       | -81.89 | -179.1 to 15.30  | No  | ns   | 0.2249  |
| Primary HA Monensin vs. Mito80 hASTROs Monensin   | -29.99 | -127.2 to 67.19  | No  | ns   | 0.9998  |
| Primary HA Monensin vs. Mito80 hASTROs IFNy       | -271.9 | -369.1 to -174.7 | Yes | **** | <0.0001 |
| Primary HA Monensin vs. Mito234 hASTROs DMSO      | -45.69 | -142.9 to 51.49  | No  | ns   | 0.9736  |
| Primary HA Monensin vs. Mito 234 hASTROs Monensin | -9.947 | -107.8 to 87.90  | No  | ns   | >0.9999 |
| Primary HA Monensin vs. Mito 234 hASTROs IFNy     | -257.8 | -354.9 to -160.6 | Yes | **** | <0.0001 |
| Primary HA Monensin vs. Hues8 hASTROs DMSO        | -45.41 | -142.6 to 51.78  | No  | ns   | 0.9752  |
| Primary HA Monensin vs. Hues8 hASTROs Monensin    | -20.83 | -118.0 to 76.36  | No  | ns   | >0.9999 |
| Primary HA Monensin vs. Hues8 hASTROs IFNy        | -141.1 | -238.3 to -43.95 | Yes | **** | <0.0001 |
| Primary HA Monensin vs. 1016A hASTROs DMSO        | -45.69 | -142.9 to 51.49  | No  | ns   | 0.9736  |
| Primary HA Monensin vs. 1016A hASTROs Monensin    | -17.53 | -114.7 to 79.65  | No  | ns   | >0.9999 |

|                                                           |        |                  |     |      |         |
|-----------------------------------------------------------|--------|------------------|-----|------|---------|
| Primary HA Monensin vs. 1016A hASTROs IFN $\gamma$        | -311.9 | -409.1 to -214.7 | Yes | **** | <0.0001 |
| Primary HA IFN $\gamma$ vs. Mito80 hASTROs DMSO           | 80.24  | -14.13 to 174.6  | No  | ns   | 0.2113  |
| Primary HA IFN $\gamma$ vs. Mito80 hASTROs Monensin       | 132.1  | 37.77 to 226.5   | Yes | ***  | 0.0002  |
| Primary HA IFN $\gamma$ vs. Mito80 hASTROs IFN $\gamma$   | -109.7 | -204.1 to -15.37 | Yes | **   | 0.0067  |
| Primary HA IFN $\gamma$ vs. Mito234 hASTROs DMSO          | 116.4  | 22.07 to 210.8   | Yes | **   | 0.0025  |
| Primary HA IFN $\gamma$ vs. Mito 234 hASTROs Monensin     | 152.2  | 57.13 to 247.2   | Yes | **** | <0.0001 |
| Primary HA IFN $\gamma$ vs. Mito 234 hASTROs IFN $\gamma$ | -95.62 | -190.0 to -1.253 | Yes | *    | 0.0431  |
| Primary HA IFN $\gamma$ vs. Hues8 hASTROs DMSO            | 116.7  | 22.35 to 211.1   | Yes | **   | 0.0024  |
| Primary HA IFN $\gamma$ vs. Hues8 hASTROs Monensin        | 141.3  | 46.93 to 235.7   | Yes | **** | <0.0001 |
| Primary HA IFN $\gamma$ vs. Hues8 hASTROs IFN $\gamma$    | 21     | -73.37 to 115.4  | No  | ns   | >0.9999 |
| Primary HA IFN $\gamma$ vs. 1016A hASTROs DMSO            | 116.4  | 22.07 to 210.8   | Yes | **   | 0.0025  |
| Primary HA IFN $\gamma$ vs. 1016A hASTROs Monensin        | 144.6  | 50.23 to 239.0   | Yes | **** | <0.0001 |
| Primary HA IFN $\gamma$ vs. 1016A hASTROs IFN $\gamma$    | -149.8 | -244.2 to -55.43 | Yes | **** | <0.0001 |
| Mito80 hASTROs DMSO vs. Mito80 hASTROs Monensin           | 51.9   | -25.15 to 128.9  | No  | ns   | 0.6327  |
| Mito80 hASTROs DMSO vs. Mito80 hASTROs IFN $\gamma$       | -190   | -267.0 to -112.9 | Yes | **** | <0.0001 |
| Mito80 hASTROs DMSO vs. Mito234 hASTROs DMSO              | 36.2   | -40.85 to 113.2  | No  | ns   | 0.9739  |
| Mito80 hASTROs DMSO vs. Mito 234 hASTROs Monensin         | 71.94  | -5.942 to 149.8  | No  | ns   | 0.1099  |
| Mito80 hASTROs DMSO vs. Mito 234 hASTROs IFN $\gamma$     | -175.9 | -252.9 to -98.81 | Yes | **** | <0.0001 |
| Mito80 hASTROs DMSO vs. Hues8 hASTROs DMSO                | 36.48  | -40.57 to 113.5  | No  | ns   | 0.9718  |
| Mito80 hASTROs DMSO vs. Hues8 hASTROs Monensin            | 61.06  | -15.99 to 138.1  | No  | ns   | 0.3268  |
| Mito80 hASTROs DMSO vs. Hues8 hASTROs IFN $\gamma$        | -59.24 | -136.3 to 17.81  | No  | ns   | 0.3825  |
| Mito80 hASTROs DMSO vs. 1016A hASTROs DMSO                | 36.2   | -40.85 to 113.2  | No  | ns   | 0.9739  |
| Mito80 hASTROs DMSO vs. 1016A hASTROs Monensin            | 64.36  | -12.69 to 141.4  | No  | ns   | 0.2383  |
| Mito80 hASTROs DMSO vs. 1016A hASTROs IFN $\gamma$        | -230   | -307.1 to -153.0 | Yes | **** | <0.0001 |
| Mito80 hASTROs Monensin vs. Mito80 hASTROs IFN $\gamma$   | -241.9 | -318.9 to -164.8 | Yes | **** | <0.0001 |

|                                                               |        |                  |     |      |         |
|---------------------------------------------------------------|--------|------------------|-----|------|---------|
| Mito80 hASTROs Monensin vs. Mito234 hASTROs DMSO              | -15.7  | -92.75 to 61.35  | No  | ns   | >0.9999 |
| Mito80 hASTROs Monensin vs. Mito 234 hASTROs Monensin         | 20.04  | -57.84 to 97.93  | No  | ns   | >0.9999 |
| Mito80 hASTROs Monensin vs. Mito 234 hASTROs IFN $\gamma$     | -227.8 | -304.8 to -150.7 | Yes | **** | <0.0001 |
| Mito80 hASTROs Monensin vs. Hues8 hASTROs DMSO                | -15.42 | -92.47 to 61.64  | No  | ns   | >0.9999 |
| Mito80 hASTROs Monensin vs. Hues8 hASTROs Monensin            | 9.165  | -67.89 to 86.22  | No  | ns   | >0.9999 |
| Mito80 hASTROs Monensin vs. Hues8 hASTROs IFN $\gamma$        | -111.1 | -188.2 to -34.09 | Yes | **** | <0.0001 |
| Mito80 hASTROs Monensin vs. 1016A hASTROs DMSO                | -15.7  | -92.75 to 61.35  | No  | ns   | >0.9999 |
| Mito80 hASTROs Monensin vs. 1016A hASTROs Monensin            | 12.46  | -64.59 to 89.51  | No  | ns   | >0.9999 |
| Mito80 hASTROs Monensin vs. 1016A hASTROs IFN $\gamma$        | -281.9 | -359.0 to -204.9 | Yes | **** | <0.0001 |
| Mito80 hASTROs IFN $\gamma$ vs. Mito234 hASTROs DMSO          | 226.2  | 149.1 to 303.2   | Yes | **** | <0.0001 |
| Mito80 hASTROs IFN $\gamma$ vs. Mito 234 hASTROs Monensin     | 261.9  | 184.0 to 339.8   | Yes | **** | <0.0001 |
| Mito80 hASTROs IFN $\gamma$ vs. Mito 234 hASTROs IFN $\gamma$ | 14.12  | -62.93 to 91.17  | No  | ns   | >0.9999 |
| Mito80 hASTROs IFN $\gamma$ vs. Hues8 hASTROs DMSO            | 226.5  | 149.4 to 303.5   | Yes | **** | <0.0001 |
| Mito80 hASTROs IFN $\gamma$ vs. Hues8 hASTROs Monensin        | 251    | 174.0 to 328.1   | Yes | **** | <0.0001 |
| Mito80 hASTROs IFN $\gamma$ vs. Hues8 hASTROs IFN $\gamma$    | 130.7  | 53.69 to 207.8   | Yes | **** | <0.0001 |
| Mito80 hASTROs IFN $\gamma$ vs. 1016A hASTROs DMSO            | 226.2  | 149.1 to 303.2   | Yes | **** | <0.0001 |
| Mito80 hASTROs IFN $\gamma$ vs. 1016A hASTROs Monensin        | 254.3  | 177.3 to 331.4   | Yes | **** | <0.0001 |
| Mito80 hASTROs IFN $\gamma$ vs. 1016A hASTROs IFN $\gamma$    | -40.06 | -117.1 to 36.99  | No  | ns   | 0.9346  |
| Mito234 hASTROs DMSO vs. Mito 234 hASTROs Monensin            | 35.75  | -42.14 to 113.6  | No  | ns   | 0.9792  |
| Mito234 hASTROs DMSO vs. Mito 234 hASTROs IFN $\gamma$        | -212.1 | -289.1 to -135.0 | Yes | **** | <0.0001 |
| Mito234 hASTROs DMSO vs. Hues8 hASTROs DMSO                   | 0.2857 | -76.77 to 77.34  | No  | ns   | >0.9999 |
| Mito234 hASTROs DMSO vs. Hues8 hASTROs Monensin               | 24.87  | -52.18 to 101.9  | No  | ns   | 0.9997  |
| Mito234 hASTROs DMSO vs. Hues8                                | -95.44 | -172.5 to -18.39 | Yes | **   | 0.0023  |

| hASTROs IFNy                                         |            |                  |     |      |         |
|------------------------------------------------------|------------|------------------|-----|------|---------|
| Mito234 hASTROs DMSO vs. 1016A hASTROs DMSO          | -6.668E-06 | -77.05 to 77.05  | No  | ns   | >0.9999 |
| Mito234 hASTROs DMSO vs. 1016A hASTROs Monensin      | 28.16      | -48.89 to 105.2  | No  | ns   | 0.9983  |
| Mito234 hASTROs DMSO vs. 1016A hASTROs IFNy          | -266.2     | -343.3 to -189.2 | Yes | **** | <0.0001 |
| Mito 234 hASTROs Monensin vs. Mito 234 hASTROs IFNy  | -247.8     | -325.7 to -169.9 | Yes | **** | <0.0001 |
| Mito 234 hASTROs Monensin vs. Hues8 hASTROs DMSO     | -35.46     | -113.3 to 42.42  | No  | ns   | 0.9808  |
| Mito 234 hASTROs Monensin vs. Hues8 hASTROs Monensin | -10.88     | -88.76 to 67.00  | No  | ns   | >0.9999 |
| Mito 234 hASTROs Monensin vs. Hues8 hASTROs IFNy     | -131.2     | -209.1 to -53.30 | Yes | **** | <0.0001 |
| Mito 234 hASTROs Monensin vs. 1016A hASTROs DMSO     | -35.75     | -113.6 to 42.14  | No  | ns   | 0.9792  |
| Mito 234 hASTROs Monensin vs. 1016A hASTROs Monensin | -7.584     | -85.47 to 70.30  | No  | ns   | >0.9999 |
| Mito 234 hASTROs Monensin vs. 1016A hASTROs IFNy     | -302       | -379.9 to -224.1 | Yes | **** | <0.0001 |
| Mito 234 hASTROs IFNy vs. Hues8 hASTROs DMSO         | 212.3      | 135.3 to 289.4   | Yes | **** | <0.0001 |
| Mito 234 hASTROs IFNy vs. Hues8 hASTROs Monensin     | 236.9      | 159.9 to 314.0   | Yes | **** | <0.0001 |
| Mito 234 hASTROs IFNy vs. Hues8 hASTROs IFNy         | 116.6      | 39.57 to 193.7   | Yes | **** | <0.0001 |
| Mito 234 hASTROs IFNy vs. 1016A hASTROs DMSO         | 212.1      | 135.0 to 289.1   | Yes | **** | <0.0001 |
| Mito 234 hASTROs IFNy vs. 1016A hASTROs Monensin     | 240.2      | 163.2 to 317.3   | Yes | **** | <0.0001 |
| Mito 234 hASTROs IFNy vs. 1016A hASTROs IFNy         | -54.17     | -131.2 to 22.88  | No  | ns   | 0.5536  |
| Hues8 hASTROs DMSO vs. Hues8 hASTROs Monensin        | 24.58      | -52.47 to 101.6  | No  | ns   | 0.9997  |
| Hues8 hASTROs DMSO vs. Hues8 hASTROs IFNy            | -95.72     | -172.8 to -18.67 | Yes | **   | 0.0022  |
| Hues8 hASTROs DMSO vs. 1016A hASTROs DMSO            | -0.2857    | -77.34 to 76.77  | No  | ns   | >0.9999 |
| Hues8 hASTROs DMSO vs. 1016A hASTROs Monensin        | 27.88      | -49.17 to 104.9  | No  | ns   | 0.9985  |
| Hues8 hASTROs DMSO vs. 1016A hASTROs IFNy            | -266.5     | -343.6 to -189.5 | Yes | **** | <0.0001 |
| Hues8 hASTROs Monensin vs. Hues8 hASTROs IFNy        | -120.3     | -197.4 to -43.25 | Yes | **** | <0.0001 |

|                                                           |        |                  |     |      |         |
|-----------------------------------------------------------|--------|------------------|-----|------|---------|
| Hues8 hASTROs Monensin vs. 1016A hASTROs DMSO             | -24.87 | -101.9 to 52.18  | No  | ns   | 0.9997  |
| Hues8 hASTROs Monensin vs. 1016A hASTROs Monensin         | 3.295  | -73.76 to 80.35  | No  | ns   | >0.9999 |
| Hues8 hASTROs Monensin vs. 1016A hASTROs IFN $\gamma$     | -291.1 | -368.1 to -214.0 | Yes | **** | <0.0001 |
| Hues8 hASTROs IFN $\gamma$ vs. 1016A hASTROs DMSO         | 95.44  | 18.39 to 172.5   | Yes | **   | 0.0023  |
| Hues8 hASTROs IFN $\gamma$ vs. 1016A hASTROs Monensin     | 123.6  | 46.55 to 200.6   | Yes | **** | <0.0001 |
| Hues8 hASTROs IFN $\gamma$ vs. 1016A hASTROs IFN $\gamma$ | -170.8 | -247.8 to -93.74 | Yes | **** | <0.0001 |
| 1016A hASTROs DMSO vs. 1016A hASTROs Monensin             | 28.16  | -48.89 to 105.2  | No  | ns   | 0.9983  |
| 1016A hASTROs DMSO vs. 1016A hASTROs IFN $\gamma$         | -266.2 | -343.3 to -189.2 | Yes | **** | <0.0001 |
| 1016A hASTROs Monensin vs. 1016A hASTROs IFN $\gamma$     | -294.4 | -371.4 to -217.3 | Yes | **** | <0.0001 |



Table S2  
Validation of 24 selected compounds using 1016A-hASTRO at 4 different concentrations

| Compound               | Concentration | % Secretion of C4 (DMSO 100%) |             |             | Average     | Validated |
|------------------------|---------------|-------------------------------|-------------|-------------|-------------|-----------|
|                        |               |                               |             |             |             |           |
| Belinostat (PXD101)    | 1             | 95.2169815                    | 123.5234765 | 104.6243127 | 107.7882569 | Yes       |
|                        | 0.3           | 91.89608455                   | 92.76030951 | 96.30264011 | 93.65301139 |           |
|                        | 0.1           | 68.23005359                   | 79.14196183 | 78.62576541 | 75.33259361 |           |
|                        | 0.03          | 63.54194938                   | 71.65700094 | 77.27826728 | 70.8257392  |           |
| Ibrutinib (PCI-32765)  | 1             | 83.56999764                   | 98.02156495 | 91.96776864 | 91.18644374 | No        |
|                        | 0.3           | 81.99842407                   | 93.33271476 | 96.40280996 | 90.57798293 |           |
|                        | 0.1           | 92.99533882                   | 98.23330343 | 95.8977659  | 95.70880272 |           |
|                        | 0.03          | 98.07704349                   | 104.0754248 | 101.1784421 | 101.1103035 |           |
| GSK690693              | 1             | 58.75426735                   | 66.95471968 | 69.14141915 | 64.95013539 | Yes       |
|                        | 0.3           | 64.10548946                   | 66.86248909 | 73.36242093 | 68.11013316 |           |
|                        | 0.1           | 70.3177016                    | 74.44880503 | 82.66515572 | 75.81055412 |           |
|                        | 0.03          | 76.90184931                   | 79.57479707 | 83.8365375  | 80.10439463 |           |
| Varespladib (LY315920) | 1             | 87.8964463                    | 87.22142366 | 88.85591699 | 87.99126232 | Yes       |
|                        | 0.3           | 90.39282702                   | 86.02299073 | 87.1774448  | 87.86442085 |           |
|                        | 0.1           | 98.63932571                   | 86.35215792 | 94.38084983 | 93.12411115 |           |
|                        | 0.03          | 90.98801493                   | 103.1711957 | 109.8685567 | 101.3425891 |           |
| AZD7762                | 1             | 428.0135222                   | 353.0607578 | 246.7650333 | 342.6131044 | Yes       |
|                        | 0.3           | 101.4098103                   | 75.32060969 | 83.32667624 | 86.68569873 |           |
|                        | 0.1           | 78.73642004                   | 73.97142634 | 81.17640571 | 77.96141736 |           |
|                        | 0.03          | 76.25622747                   | 76.81839061 | 82.44848825 | 78.50770211 |           |
| GW9662                 | 1             | 74.61052695                   | 73.82237604 | 75.08148865 | 74.50479721 | Yes       |
|                        | 0.3           | 74.16194372                   | 77.083787   | 76.83362874 | 76.02645315 |           |
|                        | 0.1           | 88.45101493                   | 85.29311444 | 84.12572283 | 85.9566174  |           |
|                        | 0.03          | 94.60764394                   | 100.3253313 | 91.75010343 | 95.56102622 |           |
| LY2228820              | 1             | 83.46272218                   | 94.27244298 | 89.66285358 | 89.13267291 | Yes       |
|                        | 0.3           | 82.76632331                   | 74.68972832 | 80.21547746 | 79.22384303 |           |
|                        | 0.1           | 70.47357593                   | 73.95570824 | 77.07523622 | 73.83484013 |           |
|                        | 0.03          | 72.00591028                   | 76.2146077  | 81.35085973 | 76.52379257 |           |
| IMD 0354               | 1             | 90.45184577                   | 95.25979359 | 82.36408532 | 89.35857489 | Yes       |
|                        | 0.3           | 60.34602274                   | 56.28864941 | 55.84434866 | 57.49300694 |           |
|                        | 0.1           | 58.28169705                   | 54.34849913 | 46.69668068 | 53.10895895 |           |
|                        | 0.03          | 103.8889257                   | 106.66407   | 88.06620552 | 99.53973374 |           |
| I-BET151 (GSK1210151A) | 1             | 78.91158792                   | 76.97793766 | 77.95196323 | 77.94716294 | Yes       |
|                        | 0.3           | 67.60396387                   | 64.9129914  | 65.31898696 | 65.94531408 |           |
|                        | 0.1           | 60.5288406                    | 62.60796768 | 58.50765973 | 60.54815601 |           |
|                        | 0.03          | 66.94705719                   | 69.88867868 | 67.17754866 | 68.00442818 |           |
| Erastin                | 1             | 79.99510288                   | 82.76262526 | 81.67271497 | 81.47681437 | Yes       |
|                        | 0.3           | 88.72364361                   | 87.17221559 | 87.24596288 | 87.71394069 |           |
|                        | 0.1           | 96.86111558                   | 91.61333981 | 86.92456436 | 91.79967325 |           |
|                        | 0.03          | 105.9705779                   | 108.0923435 | 99.41586504 | 104.4929288 |           |
| (+) -JQ1               | 1             | 75.19657934                   | 79.16480919 | 78.85474141 | 77.73870998 | Yes       |
|                        | 0.3           | 66.52840422                   | 66.71362551 | 69.31264659 | 67.51822544 |           |
|                        | 0.1           | 59.88210024                   | 60.66952037 | 61.70045966 | 60.75069342 |           |
|                        | 0.03          | 60.14089928                   | 62.37701185 | 61.50552844 | 61.34114652 |           |
| ML161                  | 1             | 84.010552                     | 86.20036629 | 82.89221916 | 84.36771248 | Yes       |
|                        | 0.3           | 89.17635192                   | 90.82370106 | 84.80234635 | 88.26746644 |           |
|                        | 0.1           | 95.31284703                   | 96.67920796 | 85.08767872 | 92.35991123 |           |
|                        | 0.03          | 106.6794618                   | 105.862788  | 96.80206695 | 103.1147723 |           |
| Vildagliptin (LAF-237) | 1             | 92.86335103                   | 104.8711309 | 108.5931886 | 102.1092235 | Yes       |
|                        | 0.3           | 89.03423407                   | 86.74142787 | 92.87251633 | 89.54939276 |           |
|                        | 0.1           | 81.45376409                   | 86.50655818 | 88.58469245 | 85.5150049  |           |
|                        | 0.03          | 81.57095851                   | 86.94509178 | 94.96105718 | 87.82570249 |           |
| PTC-209                | 1             | 60.88401343                   | 60.69267208 | 59.99760941 | 60.52476497 | Yes       |
|                        | 0.3           | 96.41747525                   | 88.08412925 | 93.69910968 | 92.73357139 |           |
|                        | 0.1           | 94.17426218                   | 93.74097315 | 89.76727858 | 92.56083797 |           |
|                        | 0.03          | 108.7939802                   | 111.7532315 | 103.5269119 | 108.0247079 |           |
| ABT-263 (Navitoclax)   | 1             | 87.41333962                   | 105.870695  | 100.5848625 | 97.95629902 | Yes       |
|                        | 0.3           | 90.73574511                   | 94.02890454 | 99.24429766 | 94.66964911 |           |
|                        | 0.1           | 85.13185048                   | 88.16529121 | 94.17427785 | 89.15713985 |           |

|                        |      |             |             |             |             |     |
|------------------------|------|-------------|-------------|-------------|-------------|-----|
|                        | 0.03 | 91.35005206 | 86.08388999 | 98.49759471 | 91.97717892 |     |
| SGLI-1027              | 1    | 80.92308677 | 93.16635012 | 88.31402846 | 87.46782178 | Yes |
|                        | 0.3  | 90.40017171 | 89.78852004 | 90.05043592 | 90.07970922 |     |
|                        | 0.1  | 98.23272693 | 93.41645837 | 90.84699459 | 94.1653933  |     |
|                        | 0.03 | 115.9928741 | 114.7690671 | 105.4690064 | 112.0769825 |     |
| Bosutinib (SKI-606)    | 1    | 85.1772622  | 91.47138095 | 83.5963562  | 86.74833312 | Yes |
|                        | 0.3  | 74.93109083 | 81.71920767 | 84.52823198 | 80.39284349 |     |
|                        | 0.1  | 82.18221027 | 85.85486434 | 84.50255492 | 84.17987651 |     |
|                        | 0.03 | 80.48689461 | 87.91206778 | 90.10366699 | 86.16754313 |     |
| Ruxotinib (INCB018424) | 1    | 80.96722201 | 87.05719514 | 80.45707879 | 82.82716531 | Yes |
|                        | 0.3  | 73.44676345 | 72.21225817 | 72.72301084 | 72.79401082 |     |
|                        | 0.1  | 66.9308504  | 73.65611595 | 70.80592954 | 70.46429863 |     |
|                        | 0.03 | 71.20937316 | 73.33368219 | 76.22871749 | 73.59059095 |     |
| MK-2206 2HCl           | 1    | 84.05291163 | 95.11900491 | 95.51319065 | 91.5617024  | No  |
|                        | 0.3  | 85.69045185 | 95.06947341 | 101.5998704 | 94.11993188 |     |
|                        | 0.1  | 91.93251475 | 96.13325985 | 98.8339452  | 95.63323993 |     |
|                        | 0.03 | 97.42249037 | 93.7011677  | 105.6661796 | 98.9299459  |     |
| VX-745                 | 1    | 99.50376677 | 113.935861  | 119.5180993 | 110.985909  | No  |
|                        | 0.3  | 108.2053545 | 118.118848  | 122.2049908 | 116.1763978 |     |
|                        | 0.1  | 116.1682534 | 116.1513317 | 121.9360275 | 118.0852042 |     |
|                        | 0.03 | 113.3344424 | 124.2666808 | 127.3698014 | 121.6569749 |     |
| OTX-015                | 1    | 78.71617337 | 59.32152991 | 67.09027886 | 68.37599405 | Yes |
|                        | 0.3  | 61.80954442 | 60.77857342 | 70.84144142 | 64.47651975 |     |
|                        | 0.1  | 62.58220759 | 63.3558413  | 79.86112016 | 68.59972302 |     |
|                        | 0.03 | 62.87345176 | 71.4525039  | 102.6127065 | 78.97955406 |     |
| NMS-873                | 1    | 89.76377054 | 79.06161019 | 77.45860942 | 82.09466338 | Yes |
|                        | 0.3  | 81.18810678 | 78.023349   | 89.28950217 | 82.83365265 |     |
|                        | 0.1  | 78.7908697  | 88.91999701 | 98.42465161 | 88.71183944 |     |
|                        | 0.03 | 85.23053545 | 88.62753975 | 124.9402431 | 99.59943944 |     |
| Tofacitinib            | 1    | 72.67305317 | 57.30246064 | 62.0140359  | 63.99651657 | Yes |
|                        | 0.3  | 66.59902169 | 64.06034593 | 79.51121394 | 70.05686052 |     |
|                        | 0.1  | 70.51200554 | 77.31229664 | 94.89409898 | 80.90613372 |     |
|                        | 0.03 | 72.6500809  | 85.69045191 | 116.187631  | 91.50938794 |     |
| GSK1904529A            | 1    | 92.76478477 | 99.82876275 | 105.1572298 | 99.25025911 | No  |
|                        | 0.3  | 99.26345563 | 102.9419078 | 112.368375  | 104.8579128 |     |
|                        | 0.1  | 99.59804975 | 113.7800183 | 112.9462349 | 108.7747677 |     |
|                        | 0.03 | 102.2262498 | 110.6111959 | 120.2550754 | 111.0308403 |     |

Table S3  
Validation of 24 selected compounds using Mito234-hASTRO at 4 different concentrations

| Compound               | Concentration | % Secretion of C4 (DMSO 100%) |             |             | Average     | Validated |
|------------------------|---------------|-------------------------------|-------------|-------------|-------------|-----------|
|                        |               |                               |             |             |             |           |
| Belinostat (PXD101)    | 1             | 522.1910553                   | 438.8527116 | 1027.093471 | 662.7124128 | Nd        |
|                        | 0.3           | 220.7332291                   | 213.4512381 | 229.339554  | 221.1746737 |           |
|                        | 0.1           | 150.0758234                   | 140.3596179 | 157.8343686 | 149.42327   |           |
|                        | 0.03          | 110.3331529                   | 130.8891834 | 121.5962393 | 120.9395252 |           |
| Ibrutinib (PCI-32765)  | 1             | 105.1186847                   | 88.95934221 | 110.2589914 | 101.4456728 | No        |
|                        | 0.3           | 102.515044                    | 109.7486189 | 115.239956  | 109.167873  |           |
|                        | 0.1           | 102.7596253                   | 103.48677   | 106.9027155 | 104.3830369 |           |
|                        | 0.03          | 93.14296846                   | 114.9734637 | 127.6528421 | 111.9230914 |           |
| GSK690693              | 1             | 76.54799708                   | 69.74280076 | 86.48464041 | 77.59181275 | Yes       |
|                        | 0.3           | 71.9302617                    | 68.16227494 | 79.51876399 | 73.20376688 |           |
|                        | 0.1           | 70.46295559                   | 75.9626701  | 86.479523   | 77.63504957 |           |
|                        | 0.03          | 94.4542441                    | 95.86453298 | 101.9788229 | 97.43253332 |           |
| Varespladib (LY315920) | 1             | 91.53546215                   | 91.37392898 | 109.6332578 | 97.51421632 | No        |
|                        | 0.3           | 90.24238457                   | 102.3872423 | 103.7369341 | 98.78885367 |           |
|                        | 0.1           | 93.04504111                   | 103.6451363 | 105.1567211 | 100.6156329 |           |
|                        | 0.03          | 97.80439345                   | 111.6016999 | 120.313305  | 109.9064661 |           |
| AZD7762                | 1             | 547.2598113                   | 521.2717792 | 470.0326009 | 512.8547305 | No        |
|                        | 0.3           | 151.9154489                   | 134.9170286 | 152.5481281 | 146.4602019 |           |
|                        | 0.1           | 125.9502618                   | 100.8260868 | 115.814994  | 114.1971142 |           |
|                        | 0.03          | 100.1755749                   | 104.0994573 | 107.9015423 | 104.0588582 |           |
| GW9662                 | 1             | 89.86008276                   | 78.93393861 | 88.74271738 | 85.84557958 | Yes       |
|                        | 0.3           | 101.1293804                   | 84.69813549 | 91.57028791 | 92.46593459 |           |
|                        | 0.1           | 95.69022361                   | 100.1096194 | 114.1563943 | 103.3187458 |           |
|                        | 0.03          | 98.22966834                   | 117.0546776 | 113.8474167 | 109.7105875 |           |
| LY2228820              | 1             | 128.562789                    | 105.1197898 | 136.0467296 | 123.2431028 | Yes       |
|                        | 0.3           | 82.67275581                   | 94.68925216 | 102.6229925 | 93.3283335  |           |
|                        | 0.1           | 83.85350327                   | 78.75526369 | 94.62622688 | 85.74499795 |           |
|                        | 0.03          | 90.41853568                   | 82.49478436 | 94.2054218  | 89.03958062 |           |
| IMD 0354               | 1             | 250.0607559                   | 234.5815535 | 245.5594384 | 243.4005826 | Nd        |
|                        | 0.3           | 174.3172734                   | 140.2721332 | 143.6825871 | 152.7573312 |           |
|                        | 0.1           | 108.9593955                   | 109.0915244 | 115.0157861 | 111.0222353 |           |
|                        | 0.03          | 125.5655989                   | 116.9654265 | 125.0744685 | 122.5351646 |           |
| I-BET151 (GSK1210151A) | 1             | 127.8497684                   | 133.0424856 | 160.3189208 | 140.4037249 | yes       |
|                        | 0.3           | 79.22563207                   | 99.79042198 | 107.747432  | 95.58782868 |           |
|                        | 0.1           | 80.24956741                   | 74.10509807 | 87.48520755 | 80.61329101 |           |
|                        | 0.03          | 80.8138032                    | 77.81675235 | 84.7541729  | 81.12824281 |           |
| Erastin                | 1             | 96.02401712                   | 94.65771067 | 108.2476605 | 99.64312944 | No        |
|                        | 0.3           | 96.37618408                   | 97.28715769 | 103.0833955 | 98.9155791  |           |
|                        | 0.1           | 95.85593596                   | 109.7189551 | 109.2061585 | 104.9270165 |           |
|                        | 0.03          | 107.8174417                   | 116.8215438 | 124.5642188 | 116.4010681 |           |
| (+) -JQ1               | 1             | 120.6489983                   | 126.4673794 | 148.6104355 | 131.9089377 | Yes       |
|                        | 0.3           | 88.03092198                   | 95.3301949  | 102.4111162 | 95.25741103 |           |
|                        | 0.1           | 87.33502963                   | 79.6831507  | 87.63951876 | 84.8858997  |           |
|                        | 0.03          | 76.80957793                   | 75.83383152 | 84.17728915 | 78.94023287 |           |
| ML161                  | 1             | 87.13661974                   | 92.4217801  | 105.9787584 | 95.17905276 | No        |
|                        | 0.3           | 97.38605458                   | 93.93108413 | 110.0386576 | 100.4519321 |           |
|                        | 0.1           | 101.1213005                   | 98.89158988 | 114.2514397 | 104.7547767 |           |
|                        | 0.03          | 110.4594469                   | 117.8485286 | 128.6161987 | 118.9747248 |           |
| Vildagliptin (LAF-237) | 1             | 108.7232541                   | 97.36495482 | 138.9632822 | 115.0171637 | No        |
|                        | 0.3           | 97.0112198                    | 100.1777423 | 114.4804021 | 103.889788  |           |
|                        | 0.1           | 96.51862174                   | 98.12808887 | 106.1858107 | 100.2775071 |           |
|                        | 0.03          | 97.70865936                   | 99.30991792 | 105.7636268 | 100.9274014 |           |
| PTC-209                | 1             | 83.24641121                   | 81.95252714 | 91.50233058 | 85.56708964 | Yes       |
|                        | 0.3           | 95.3575607                    | 103.9216548 | 106.3361869 | 101.8718008 |           |
|                        | 0.1           | 104.0427914                   | 103.6173317 | 114.1839674 | 107.2813635 |           |
|                        | 0.03          | 104.1300541                   | 116.172416  | 143.9418511 | 121.4147737 |           |
| ABT-263 (Navitoclax)   | 1             | 92.55864775                   | 83.42050727 | 113.056786  | 96.34531366 | No        |
|                        | 0.3           | 81.03278273                   | 94.79330837 | 104.7237782 | 93.51662311 |           |
|                        | 0.1           | 103.1948991                   | 80.38901278 | 100.0953594 | 94.55975708 |           |

|                          |      |             |             |             |             |     |
|--------------------------|------|-------------|-------------|-------------|-------------|-----|
|                          | 0.03 | 92.09185895 | 100.0299804 | 100.1230785 | 97.41497262 |     |
| SGL-1027                 | 1    | 97.21099125 | 93.08548725 | 115.8763087 | 102.0575957 | No  |
|                          | 0.3  | 101.235752  | 104.6297678 | 113.4187061 | 106.4280753 |     |
|                          | 0.1  | 102.3881761 | 104.6352401 | 124.9114463 | 110.6449542 |     |
|                          | 0.03 | 101.7448925 | 119.1731172 | 126.7881753 | 115.9020617 |     |
| Bosutinib (SKI-606)      | 1    | 111.8315705 | 101.823071  | 122.7940397 | 112.1495604 | Yes |
|                          | 0.3  | 87.37414817 | 90.79911392 | 104.5728193 | 94.24869381 |     |
|                          | 0.1  | 86.69188691 | 78.29848837 | 90.88438271 | 85.291586   |     |
|                          | 0.03 | 99.52521496 | 107.893675  | 100.5397675 | 102.6528858 |     |
| Ruxolitinib (INCB018424) | 1    | 97.4694754  | 78.47101691 | 103.8354306 | 93.25864096 | Yes |
|                          | 0.3  | 79.08329487 | 76.61785331 | 87.91493605 | 81.20536141 |     |
|                          | 0.1  | 73.82343602 | 73.04704072 | 76.71401306 | 74.52816327 |     |
|                          | 0.03 | 78.1532461  | 90.65162264 | 92.32895076 | 87.0446065  |     |
| MK-2206 2HCl             | 1    | 122.952508  | 86.43238921 | 121.7941461 | 110.3930144 | No  |
|                          | 0.3  | 110.5142731 | 95.42194722 | 104.9080292 | 103.6147499 |     |
|                          | 0.1  | 121.576841  | 103.0396449 | 151.5953046 | 125.4039302 |     |
|                          | 0.03 | 113.6403791 | 121.4060933 | 132.9991796 | 122.681884  |     |
| VX-745                   | 1    | 101.5774408 | 99.67888112 | 104.1888008 | 101.8150409 | No  |
|                          | 0.3  | 116.9595707 | 131.7087757 | 140.3384734 | 129.6689399 |     |
|                          | 0.1  | 94.78617958 | 113.2004725 | 105.8339828 | 104.6068783 |     |
|                          | 0.03 | 123.7051212 | 109.780596  | 137.4535557 | 123.6464243 |     |
| OTX-015                  | 1    | 113.5198961 | 86.80908585 | 88.69971562 | 96.34289919 | Yes |
|                          | 0.3  | 85.24333486 | 76.74271794 | 86.07992777 | 82.68866019 |     |
|                          | 0.1  | 74.35193751 | 71.93781406 | 88.22959859 | 78.17311672 |     |
|                          | 0.03 | 68.79079574 | 76.50054963 | 100.8373975 | 82.0429143  |     |
| NMS-873                  | 1    | 176.3793391 | 129.3243038 | 124.3433566 | 143.3489998 | Yes |
|                          | 0.3  | 85.15044137 | 99.90287703 | 94.82988454 | 93.29440098 |     |
|                          | 0.1  | 94.05938609 | 99.19120564 | 102.1476623 | 98.46608467 |     |
|                          | 0.03 | 98.64078096 | 99.93528587 | 115.3866277 | 104.6542315 |     |
| Tofacitinib              | 1    | 78.96799824 | 77.03337529 | 87.4769219  | 81.15943181 | Yes |
|                          | 0.3  | 70.06014262 | 85.85217873 | 99.92418397 | 85.2788351  |     |
|                          | 0.1  | 84.15203722 | 106.1032416 | 107.5931145 | 99.28279778 |     |
|                          | 0.03 | 92.58689517 | 106.7458166 | 115.3401935 | 104.8909684 |     |
| GSK1904529A              | 1    | 90.64523106 | 108.8199128 | 119.5046035 | 106.3232491 | No  |
|                          | 0.3  | 105.5011303 | 105.9447315 | 112.306166  | 107.9173426 |     |
|                          | 0.1  | 89.59743441 | 94.25893712 | 100.184306  | 94.68022585 |     |
|                          | 0.03 | 87.80125587 | 105.1920121 | 115.8658765 | 102.9530482 |     |

Table S4 Antibodies

| Antibody                   | Host Animal              | Company                     | Catalog number | Dilution               | Application        |
|----------------------------|--------------------------|-----------------------------|----------------|------------------------|--------------------|
| CD44                       | Mouse                    | Cell Signaling              | 3750           | 1:400                  | Immunofluorescence |
| ALDH1L1                    | Rabbit                   | Abcam                       | Ab190298       | 1:250                  | Immunofluorescence |
| S100 $\beta$               | Mouse                    | Sigma                       | S2532          | 1:1000                 | Immunofluorescence |
| GFAP                       | Rabbit                   | Dako                        | M0761          | 1:400                  | Immunofluorescence |
| AQP4                       | Rabbit                   | Millipore                   | AB3594         | 1:100                  | Immunofluorescence |
| CX43                       | Rabbit                   | Sigma                       | C6219          | 1:500                  | Immunofluorescence |
| EAAT1 (SLC1A3)             | Rabbit                   | Boster                      | PA2185         | 1:100                  | Immunofluorescence |
| P65                        | Mouse                    | Santa Cruz<br>Biotechnology | SC-8008        | 1:500                  | Immunofluorescence |
| FITC Mouse Anti-Human CD44 | Mouse<br>IgG2b, $\kappa$ | BD<br>Pharmingen            | 555478         | 20 $\mu$ L<br>per test | FACS               |

|                                                 |                |                |          |               |                                                |
|-------------------------------------------------|----------------|----------------|----------|---------------|------------------------------------------------|
| PerCP-Cy 5.5 Mouse Anti-Human CD200             | Mouse IgG1, κ  | BD Pharmingen  | 562124   | 5 uL per test | FACS                                           |
| FITC Mouse IgG2b κ Isotype Control              | Mouse IgG2b, κ | Forward        | 555742   | 20 uL         | FACS                                           |
|                                                 |                | Reverse        | 555742   | 20 uL         | FACS                                           |
| PerCP-Cy™5.5 Mouse IgG1 κ Isotype Control       | Mouse IgG1, κ  | Forward        | 556795   | 5 uL          | FACS                                           |
|                                                 |                | Reverse        | 556795   | 5 uL          | FACS                                           |
| Polyclonal Antiserum to Human C4 Protein        | Goat           | Forward        | A305     | 1-1000        | ELISA                                          |
|                                                 |                | Reverse        | A305     | 1-1000        | ELISA                                          |
| Expression of GAPDH                             |                |                |          |               | ThermoFisher Scientific Catalog number: 402869 |
| C4c Complement (Conjugate)                      | Rabbit         | Forward        | 70179    | 1:1000        | ELISA                                          |
|                                                 |                | Reverse        | 70179    | 1:1000        | ELISA                                          |
| Copy number of human C4A (*)                    |                |                |          |               |                                                |
| Goat Anti-Rabbit IgG H&L (Alkaline Phosphatase) | Goat           | Forward        | ab87048  | 1:1000        | ELISA                                          |
|                                                 |                | Reverse        | ab87048  | 1:1000        | ELISA                                          |
| Copy number of human C4B (*)                    |                | Forward        |          |               |                                                |
|                                                 |                | Reverse        |          |               |                                                |
| Recombinant Anti-C4 antibody [EPR2990(2)]       | Rabbit         | Probe          | ab173577 | 1:1000        | Western Blot                                   |
|                                                 |                | Forward        | ab173577 | 1:1000        | Western Blot                                   |
| Copy number of human C4L (f)                    | Rabbit         | Reverse        | 128874   | 1:2000        | Western Blot                                   |
|                                                 |                | Forward        | 128874   | 1:2000        | Western Blot                                   |
| β-Actin                                         | Mouse          | Cell Signaling | 8H10D10  | 1:20000       | Western Blot                                   |
| Histone H3 Antibody                             | Rabbit         | Cell Signaling | 9715     | 1:20000       | Western Blot                                   |

Table S5 Primers and TaqMan probes

|                              |         |                           |
|------------------------------|---------|---------------------------|
|                              | Probe   | VIC-CTCCTCCAGTGGACATG-MGB |
| Copy number of human C4S (*) | Forward | TTGCTCGTTCTGCTCATTCCCTT   |
|                              | Reverse | GGCGCAGGCTGCTGTATT        |
|                              | Probe   | VIC-CTCCTCCAGTGGACATG-MGB |
| Copy number of human RPP30   | Forward | GATTTGGACCTGCGAGCG        |
|                              | Reverse | GCGGCTGTCTCCACAAGT        |
|                              | Probe   | FAM-CTGACCTGAAGGCTCT-MGB  |
| Human C1S                    | Forward | TAGAGATGTGGTGCAGATAAC     |
|                              | Reverse | AGGTTGACATTTTCAGTTTGG     |
| Human C2                     | Forward | GATCATGAAAATGGAAGTGGG     |
|                              | Reverse | ATCTGTCAGAAGGATGATGG      |
| Human C3                     | Forward | GAAGTGCCTTTGTCATCTTC      |
|                              | Reverse | CAGACACGTACAAAGACTTC      |
| Human C4                     | Forward | CAAAGTCAATTTTGGGGGAG      |
|                              | Reverse | CAGTACAGGTTATCTCCAGTC     |
| Human C5                     | Forward | GAGGAGTAGCAACCAAATTC      |
|                              | Reverse | CAGGTGGATTTTCTGAAGAG      |
| Human GAPDH                  | Forward | CTCTGCTCCTCCTGTTCCGAC     |
|                              | Reverse | GCGCCCAATACGACCAAATC      |

All sequences are provided in the 5' to 3' orientation. Assays identified with an asterisk (\*) were based on Wu et al. doi:10.1021/ac202028g (2011).

## **SUPPLEMENTARY EXPERIMENTAL PROCEDURES**

### **Human pluripotent stem cell lines**

All experiments with the human ESC lines were reviewed and approved by the Harvard Embryonic Stem Cell Oversight Committee. The use of the iPSC lines by the Rubin lab was reviewed by the Harvard Committee on the Use of Human Subjects (the Harvard IRB) and determined not to constitute human subjects' research. The Mito234 and the Mito80 line from a schizophrenic patient was obtained from Bruce M. Cohen, McLean Hospital. H1 C4 KO cells were generated in Lindy Barrett's laboratory (Harvard University and the Broad Institute's Stanley Center for Psychiatric Research).

## **Human pluripotent stem cell cultures**

iPSCs (1016A, Mito234 and Mito80) and ESCs (HUES8 and H1 C4 KO and WT) were cultured in StemFlex medium (ThermoFisher A3349401). When pluripotent stem cells reached 80-85% confluency, colonies were dissociated using 0.5 mM EDTA in calcium/magnesium-free PBS at room temperature and passaged on Matrigel (Corning 354234) coated on 10 or 15-cm<sup>2</sup> tissue culture dishes (Corning). When the H1 lines reached 90% confluency, cells were dissociated using Accutase (Innovative Cell Technologies) for 5 minutes of incubation at room temperature. All human pluripotent stem cells used were maintained below 15 passages and confirmed to be karyotypically normal and mycoplasma negative.

## **Stem cell adaptation and astrocyte differentiation in spinner flasks**

Pluripotent stem cells were single-cell dissociated using Accutase (Innovative Cell Technologies), as previously described in (Rigamonti et al., 2016). Briefly, cells were seeded into a 125 mL spinner flask in 100 mL of mTeSR medium supplemented with 10  $\mu$ M ROCK inhibitor Y-27632 (STEMCELL) at a concentration of  $1 \times 10^6$  cells/mL. The spinner flask was placed on a nine-position stir plate (Dura-Mag) at a speed of 55 RPM in a 37°C incubator with 5% CO<sub>2</sub>. Under these conditions, cells spontaneously aggregate, forming pluripotent spheres. Medium was changed by taking the flask off the stir plate and allowing the cells to settle to the flask's bottom. We adopted a modified protocol as previously described (Emdad et al., 2012). At day 1 of differentiation, the medium was changed to KSR (15% KSR (Life Technologies), KO DMEM (Gibco), 1% Glutamax (Gibco), 1% non-essential amino acids NEAA (Millipore), 1% penicillin-



streptomycin (Gibco), and 0.1% 2-mercaptoethanol 1,000X liquid (Gibco)) with activin/TGF- $\beta$  inhibitor SB431542 (R&D Systems) and Dorsomorphin (Stemgent) to a final concentration of 10  $\mu$ M and 1  $\mu$ M respectively. The medium was changed every day for the first 5 days. From day 6 to day 12, the medium was changed every 2 days with NB media (Neurobasal, Gibco), 2X N2 supplement 100X (Gibco), 1% Glutamax (Gibco), 1% NEAA (Gibco), 1% penicillin-streptomycin (Gibco) supplemented with Dorsomorphin, and different cytokines as specified. On day 6 and day 8, FGF2 and EGF (10 ng/mL) were added to the media. On day 10 and 12, FGF2, EGF, and CTNF (Miltenyi Biotec and R&D Systems) at a final concentration of 20 ng/mL concentration were added. On day 14, NB 2X N2 medium containing CTNF and FGF at a final concentration of 20 ng/mL was added. From day 16 onward, the medium was changed every 2 days (NB 2x N2 CTNF 20 ng/mL). For details about sphere dissociation, astrocytes culture and cryopreservation see Supplementary experimental procedures.

### **Sphere dissociation, astrocyte culture, and cryopreservation**

On day 30, spheres were dissociated using 0.25% trypsin (Gibco 25200056) and plated on overnight Poly-L-Lysine (PLL) (MP BIOMEDICALS 02194544) coated plates. First, spheres were collected in a 15 mL tube and allowed to settle. The medium was removed, and the spheres were washed with 1X PBS. After the spheres settled down, the PBS was removed. Double the volume of 0.25% trypsin was added to the spheres, and the tube was incubated in a water bath at 37°C for 5-10 minutes. Spheres were shaken periodically until the suspension looked cloudy. A volume of FBS equal to the sphere volume of FBS was added to quench the trypsin. Cells were spun for 3 minutes at 300g. After removing the supernatant, 3 mL of dissociation buffer (1x PBS, 5% FBS,

25mM Glucose, and 5mM MgCl<sub>2</sub>) was added to the tube and spheres were mechanically dissociated using a 5 mL pipette. This operation was repeated until the spheres were completely dissociated. Single cells were filtered using a 40 μM filter and centrifuged at 300g for 3 minutes. Cells were resuspended and plated at the desired concentration on Poly-L-Lysine coated plates in complete Astrocytes Medium (AM, ScienCell Research Labs #1801) with FBS, Astrocyte Growth Supplement, and Penicillin/Streptomycin Solution (ScienCell Research Labs #0010, #1852, #0503), or cryopreserved in FBS with 10% DMSO.

### **Bright-field images and immunofluorescence**

Astrocytes were plated on PLL coated 6 or 96 well plates at a density of  $5 \times 10^5$  cells and  $3 \times 10^4$  cells per well, respectively. The next day cells were fixed using 4% PFA for 15 minutes and washed with PBS three times. The cells were blocked in 10% horse serum, 0.01% Triton X-100 in PBS (for CD44 staining only) or 5% horse serum, 0.3% PBS Triton X-100, for 1 hour at room temperature. Primary antibodies were diluted as specified in Supplementary Table 4 in 5% horse serum at 4°C overnight, followed by washes in PBS and incubation with secondary antibodies (diluted 1:1000) and Hoechst (1:5000) for 1 hour at room temperature. The fluorescently conjugated antibodies used were goat anti-mouse IgG Alexa Fluor 488 (Life Technologies A11001) and goat anti-rabbit IgG Alexa Fluor 546 (Life Technologies A11010). Bright-field and immunofluorescence images were acquired using an inverted Eclipse Ti microscope (Nikon) and an ImageXpress Micro Confocal (Molecular Devices), respectively. All images were processed with Adobe Photoshop software. P65 staining and CD44

positive cells were quantified using Columbus Image Data Storage and Analysis System (PerkinElmer).

### **Flow Cytometry Analysis**

Freshly dissociated or frozen astrocytes (passage 0) were cultured as previously described until they reached 80% confluency. Cells were detached using Trypsin-EDTA solution (Sigma, T3924).  $1 \times 10^6$  cells were stained following the manufacturer's instruction for cell surface antigens using directly conjugated antibodies: FITC CD44, (555478), CD200 PerCP-Cy5.5 (562124) or isotype controls FITC Mouse IgG2B k (555742) and PerCP-Cy5.5 IgG1 k (550795). All antibodies were purchased from BD Pharmingen. Hoechst (1:5000) was used as a viability marker. Samples were processed on the LSRII flow cytometer (BD Biosciences, San Diego, CA), and data were analyzed with FlowJo software (Tree Star, Ashland, OR USA). Antibody dilutions are listed in Supplementary Table 4.

### **Phagocytosis Assay**

Primary hASTROs and stem-cell derived astrocytes were plated at a density of  $2 \times 10^5$  cells per 24 well plate. The next day different concentrations of pHrodo Green Zymosan A BioParticles Conjugates (1, 5 and 10  $\mu$ g) (P35365 Invitrogen) were resuspended in media and incubated with cells. After 12 hours cells were harvested as previously described, washed with PBS once and analyzed by flow cytometry. The percentage of GFP positive cells was analyzed using FlowJo.

### **Astrocytes treatment**

Astrocytes were treated for 48 hours if not otherwise specified. IFN $\gamma$  was used at a final concentration of 250 ng/mL, Monensin was used at 1  $\mu$ M and Polyinosinic:polycytidylic acid (poly(I:C) at 10  $\mu$ g/mL.

### **ScRNA-sequencing**

For scRNA-sequencing experiments, cells were harvested and run through the 10X Chromium Single Cell 3' Reagents V3 system to isolate individual cells into droplets per the vendor's instructions (10X Genomics; San Francisco, CA). Samples were then sequenced on a NovaSeq 6000 system (Illumina) using a S2 flow cell at 2 x 100bp. Raw sequence data was demultiplexed and aligned following the standard Drop-Seq protocol (Macosko et al., 2015). Human experiments were aligned to the GRCh38 reference and Ensembl v89 gene models. Sequencing reads were then filtered to reads that mapped at high quality (MQ $\geq$ 10) to the human genome.

Matrices were built from 10X Chromium Single Cell 3' Reagents V3 as described above. Any barcode with less than 200 genes and combined UMI matrices were used for downstream analysis using Seurat (v4.0.2) (Stuart et al., 2019). After that, barcodes were further filtered by the number of genes detected  $500 < n_{\text{Feature\_RNA}} < 95000$  and percent of mitochondrial and ribosomal genes to reduce the number of dying cells/debris:  $\text{percent.mito} < 10$ . The matrix was then processed via the Seurat pipeline by using SCTransform on a merged object running the PreSCTIntegration() function according to the sctransform integration pipeline (Hafemeister and Satija, 2019). After quality filtering, barcodes were used to compute UMAP projections using numbers of Principal Components based on ElbowPlot analysis. UMAP projection was used to determine minimum number of clusters obtained at resolution=0.2 (FindClusters) as

described previously (Limone et al., 2021). Correlation analysis between and within lines was generated by measuring the average expression of all genes shared across cell line replicates. The unsupervised clustering was performed by integrating published datasets using LIGER. First, datasets were downsampled to the smallest dataset, then normalized using SCTransform with default settings. Then, datasets were integrated running the default LIGER workflow. Dataset references: Adult astrocytes - M1 Brain atlas (Bakken et al., 2021); Fetal cortex (Polioudakis et al., 2019); iPSCs-ExN (Nehme et al., 2018); iPSCs derived cells (Barbar *et al.*, 2020; Leng *et al.*, 2021) and GW25 PFC - fetal brain atlas (Bhaduri et al., 2021).

## **ELISA**

All washes were performed three times using 150  $\mu$ l of PBS-T (Tween 0.05%). All incubations were performed at 37°C unless otherwise specified. Antibodies were incubated in a volume of 50  $\mu$ l per well. 96-well plates (Thermo Scientific 439454) were coated (overnight at 4°C) with goat anti-human C4 antibody (Quidel A305) in PBS. The next day, the plates were washed and incubated with a blocking solution (1% BSA in PBS) for 1 hour. After eliminating the blocking solution, 85  $\mu$ L of astrocyte supernatant was added to each well and incubated for 1 hour and 30 minutes. Following washes, the samples were incubated with a rabbit anti-human C4 (Dako F 0169) for one hour. Also following washes, the plates were incubated for 30 minutes with goat-anti-rabbit Alkaline Phosphatase (Abcam ab97048). In the last step following additional washes, the plates were incubated with 1M diethanolamine buffer, 0.5 mM MgCl<sub>2</sub>, pH 9.8 containing Phosphatase substrate (Sigma S0942). The reaction was stopped with 3M NaOH and read at 405 nm using a Molecular Devices SpectraMax M5 Reader. After

removal of the supernatant, 96 well plates were fixed for 15 minutes with 4% PFA at room temperature and stained with Hoechst (1:5000) for 30 minutes. 6-9 fields per well were imaged using the Operetta (PerkinElmer) or ImageXpress Micro Confocal (Molecular Devices). Nuclei numbers were quantified using Columbus Image Data Storage and Analysis System (PerkinElmer) and used to normalize secretion absorbance data. Antibodies were diluted as specified in Supplementary Table 4.

### **Cytokine array**

Astrocytes were plated in 6 well plates at a density of  $5 \times 10^5$  cells per well in complete AM media (ScienCell Research Labs). The next day, the medium was replaced with complete AM medium plus treatment; after 48 hours, the supernatant was collected and stored at  $-80^\circ\text{C}$ . Proteome Profiler™ Human Cytokine Array (R&D Systems, #ARY005B) was used according to the manufacturer's guidelines. Proteome profiler intensity dot blots were quantified using Adobe Photoshop software.

### **C4 KO cell line generation**

The XY human embryonic stem cell line H1 was commercially obtained from WiCell Research Institute. CRISPR-Cas9 based genome engineering experiments were carried out as previously described (Hazelbaker et al., 2017). In brief, to generate the C4 deletion line and wild-type control,  $1.5 \times 10^5$  H1 cells were transfected with 5pmol EnGen Cas9 NLS (New England BioLabs) plus 2.5pmol each of 5' and 3' gRNAs (Synthego) using the NEON system (Life Technologies). 5' gRNA target sequence: ACGTTTGCCACATATACATA; 3' gRNA target sequence: TATTGCCTGCACAGTTGATG. Transfected cells were then clonally isolated, followed

by deep sequencing and subcloning. PCR analysis and Sanger sequencing were used to confirm a 64.5kb deletion at the C4 locus. The wild-type control line went through targeting, clonal selection and subcloning but remained unedited at the C4 locus. SNP genotyping with the Infinium PsychArray (Illumina) was used to confirm an absence of chromosomal aberrations in C4 deletion and wild-type lines.

### **Ngn2 differentiation, ACM collection and treatment, synaptic isolation and C4 western blot**

H1 C4 WT or C4 KO ESCs were dissociated with Accutase (Innovative Cell Technologies) and plated as single cells in Matrigel-coated 6 wells at a density of  $1 \times 10^6$  in complete StemFlex with 10  $\mu$ M ROCK inhibitor Y-27632 (STEMCELL). The day after, the rtTA and TetON Ngn2 lentiviruses (purchased from ALSTEM) were added in fresh StemFlex media (1  $\mu$ l each per wells). After 24 hours, the medium was changed, and infected cells were allowed to recover and expand. Ngn2 differentiation was performed as described in (Zhang et al., 2013), with minor modifications. Briefly, ESC cells were plated on Matrigel-coated plates at a density of  $3-5 \times 10^6$  cells per 10 cm plates in mTesR with Rock inhibitor (10  $\mu$ M). For the first two days, cells were fed with N2/DMEM/F12/NEAA (Invitrogen) containing human BDNF (10 ng/mL, Miltenyi Biotec), human NGF (10 ng/mL, R&D Systems). Doxycycline (2  $\mu$ g/mL, Takara Bio to activate the TetON transgene). On day 3, medium was switched to B27/Glutamax NB media (Invitrogen) containing BDNF and NGF. On day 4, cells containing the transgene were selected by adding puromycin to the medium (1  $\mu$ g/mL Thermo Fisher Scientific). On day 5, cells were replated on PO-laminin coated dishes in the presence of Ara-C (final concentration 2  $\mu$ M). From day 5, B27/Glutamax medium was replaced every other day.

Cells were frozen on day 10 in CryStor CS10 ( $25 \times 10^6$  cells/mL) or differentiated until day 30 for experiments. Astrocyte-conditioned medium (ACM) was collected from 90% confluent astrocytes incubated for 48 hours with B27/Glutamax NB media. The supernatant was spun at 300g for 3 minutes, neuronal growth factors (BDNF and NGF) were added at a final concentration of 10 ng/mL and incubated with Ngn2 neurons for 24 hours. ACM was concentrated using 3K Amicon columns (according to the manufacture protocol) for loading on a Western Blot gel. For synaptosome purification,  $30 \times 10^6$  Ngn2 differentiated neurons were plated at day 10 on Poly-L-ornithine/Laminin coated plates. Medium was changed every 3 days. Neurons were treated with ACM for 24 hours. Synaptosomes were purified using SynPER (Thermo Fisher Scientific) following the manufacturer's datasheet. Synaptosomes were resuspended in PBS with 5% DMSO. Cells were lysed using RIPA buffer (Sigma Aldrich R0278) with protease inhibitors (Thermo Scientific 78426) and phosphatase inhibitors (78426). Whole-cell lysates concentrated, ACM or synaptosomes were loaded on a NuPAGE 4-12% Bis-Tris gel (Invitrogen) in equal amounts (50  $\mu$ g) and transferred to polyvinylidene difluoride membrane using a transfer apparatus according to the manufacturer's protocols (Bio-Rad). After incubation with 5% milk in TBST (TBST (10 mM Tris, pH 8.0, 150 mM NaCl, 0.5% Tween 20) for 1 hour, the membrane was washed 3 times with TBST and incubated with antibodies against C4 in 3% TBST overnight at 4°C. Membranes were washed three times for 10 minutes and incubated with a 1:10000 dilution of horseradish peroxidase-conjugated anti-rabbit antibodies for 1 hour. Western blots were washed with TBST three times and developed with the SuperSignal West Dura Chemiluminescent Substrate (Thermo Scientific 34075).



## **Screen, hit selection, secondary screen and dose-response**

96 well  $\mu$ -clear black imaging plates (Greiner #655090) were coated with Poly-L-Lysine (MP Biomedicals #0215017610) at a final concentration of 15  $\mu\text{g}/\text{mL}$  using the liquid handler BioTek EL406 (Agilent). Plates were incubated overnight at 37°C. The day after, plates were washed 3 times with PBS, and AM media was added to each well. Coating, washes, and media addition were performed using the BioTek EL406 liquid handler. 1016A-derived astrocytes were plated at a concentration of  $3 \times 10^4$  cells per well using the Multidrop™ Combi Reagent Dispenser (Thermo Scientific). The day after, the media was replaced with fresh media, and compounds were added at two different concentrations (1 and 0.3  $\mu\text{M}$ ) using the Thermo Scientific Matrix Hydra II 96-Channel Automated Liquid Handling System. The screen was performed in triplicate plates using the highly selective inhibitor Library (464 compounds) from Selleckchem. Two days after compound addition, the supernatant was used to perform ELISA (as previously described). Plates were stained with Hoechst using the Multidrop™ Combi Reagent Dispenser and quantified using the Operetta High-content imaging system from PerkinElmer. Nuclei were counted using the Columbus Image Data Storage and Analysis System (PerkinElmer). To exclude false positives due to cell toxicity, absorbance O.D. 405 was divided by nuclei number and normalized on DMSO control (100%). Compounds were ranked by the percentage decrease of C4. The top 24 compounds were selected for a secondary validation screen. The secondary screen was performed as previously described. Cherry-picked compounds from the stock library or freshly purchased compounds were tested at 4 concentrations (3, 1, 0.3, and 0.1  $\mu\text{M}$ ) in triplicates in 1016A-hASTRO. Compounds in the secondary screen were

considered to be validated when showing relatively minor toxicity (nuclei number greater or equal to 75% compared to DMSO control) and a C4 decrease greater than 10%. The same criteria were applied when testing compounds on Mito234-hASTROs. 12-point dose-responses (starting a 10  $\mu$ M with 1 to three dilutions) were performed with selected compounds in stem-cells derived astrocytes. The concentration values (X) were converted into logarithmic scale and normalized. Nonlinear regression, variable slope (four parameters) was used to interpolate the data and calculate the IC<sub>50</sub> using GraphPad.

### **Droplet digital PCR (ddPCR) of C4 structural elements**

The copy number and structural variation of C4 genes were measured as previously described (Sekar et al., 2016). Genomic DNA was extracted using the Genomic DNA Extraction Kit from Qiagen following manufacturer's instruction. Each gDNA was digested with *AluI* at 37°C for 1 hour. The digested DNA was used to generate droplets containing gDNA, a specific primer-probe mix for (C4A and C4L or C4B and C4S), and a reference locus (RPP30). TaqMan probes are listed in Supplementary Table 5. The droplets were generated using a microfluidic droplet generator (Bio-Rad). The droplets containing this reaction mixture were subjected to PCR using the following cycling conditions: 95°C for 10 minutes, 40 cycles of 94°C for 30 seconds, and 60°C (for C4A and C4L) or 59°C (for C4B and C4S) for 1 minute, followed by 98°C for 10 minutes. After PCR, the fluorescence (both colors) in each droplet was read using a QX100 Droplet Reader (Bio-Rad). Data were analyzed using the QuantaSoft software (Bio-Rad), which estimates the absolute concentration of DNA templates by Poisson-correcting the fraction of droplets that are positive for each amplicon (C4 or RPP30).

### **qPCR and TaqMan probes (primers)**

RNA was purified using the RNeasy Mini Kit (QIAGEN). cDNA was prepared with iSCRIPT (BioRad). All quantitative RT-PCR (qRT-PCR) reactions were performed in triplicate using the SYBER green PCR Master Mix (Applied Biosystems), and data were acquired on the QuantStudio™ 12K Flex Real-Time PCR System (Life Technologies). Ct values were calculated and normalized to the housekeeping gene, and the relative expression ratio was calculated using the Pfaffl method (Pfaffl, 2001). To detect C4A and C4B TaqMan probes and TaqMan Universal Master Mix II, no UNG was used following manufacture guidelines. TaqMan GAPDH control reagent was purchased from Thermo Fisher Scientific. Primers and TaqMan sequences are listed in Supplementary Table 5.

### **Chromatin purification and Western blot**

Cells were cultured as previously described and treated with DMSO or JQ1 for 24 hours. Cells were collected using trypsin-EDTA solution, washed once with cold PBS, and fast-frozen. The chromatin-bound fraction and the cytoplasmic fraction were isolated using Thermo Scientific's Kit (78840) following the manufacturer's instruction. Equal amounts of proteins (5 µg) were loaded on a gel, as previously described. Antibody incubation was done overnight in 5% BSA in T-BST at 4°C with gentle agitation. Antibodies used are listed in Supplementary Table 4.

### **L1000 data generation**

1016A-hASTROs and Mito234-hASTROs were plated at a density of 3000 cells/well in AM complete media in PLL coated 384 well plates. The day after, cells were treated

with 40 compounds at three different concentrations in triplicate with each cell line on a separate 384-well plate. Cells were lysed after 48 hours and were then subject to L1000 profiling as described in (Subramanian et al., 2017). Briefly, mRNA was captured using oligo-dT coated beads and reverse transcribed to cDNA. The cDNA was then PCR amplified using biotinylated, barcoded primers and gene-specific juxtaposed probe pairs resulting in gene-specific, barcoded, and biotinylated PCR amplicons. These amplicons were then hybridized to Luminex beads, stained with streptavidin R-phycoerythrin (SAPE) and detected on a FlexMAP 3D scanner, which for each bead reports the barcode, which determines gene identity, and the SAPE fluorescent intensity, which is indicative of transcript abundance.

### **L1000 data processing**

L1000 data were processed into perturbation-specific differential expression signatures as previously described (Subramanian et al., 2017). Briefly, raw fluorescent intensities (FI) were captured from the Luminex FlexMAP 3D scanner for each of the 978 L1000 landmark genes (Level 1 data). FI data were deconvoluted to extract the median FI (MFI) for the two genes being measured by each Luminex bead barcode (Level 2 data). MFI values were loess-normalized to the ten L1000 invariant gene sets within each well, and all wells on the same detection plate were then quantile normalized, resulting in each sample having the same empirical distribution (Level 3 data). Gene-wise robust z-scores were then computed for each sample, using all other samples on the same plate as the reference distribution (Level 4 data). Biological replicates were then collapsed using a weighted average, where each replicate was weighted by its average correlation

with the others (Level 5 data). The collection of Level 5 signatures is henceforth referred to as the C4-CMap dataset.

### **Query analysis**

The C4-CMap signatures were converted into gene sets by extracting the top and bottom 50 most differentially expressed genes according to the Level 5 z-score. These gene sets were then queried into the CMap Touchstone (TS) database as described in (Subramanian et al., 2017). Briefly, two-sided weighted connectivity scores (WTCS) were computed for each C4-CMap gene set relative to each TS signature. WTCS values were then normalized within each Touchstone cell line / perturbation type combination to yield normalized connectivity scores (NCS). Using the pre-computed reference NCS distributions for each TS signature, tau values were then computed as the fraction of reference NCS values more extreme than the observed NCS value for each C4-CMap gene set / TS signature combination. Cell-summarized tau ( $\tau_{\text{summary}}$ ) values were computed in a similar manner, using max-quantile aggregated NCS and reference NCS values as input.

### **Preferential connectivity analysis**

C4-CMap signatures were identified as C4-reducing according to the corresponding compound's effect on C4 and lack of effect on cell fitness, using data from the C4 ELISA experiment. The criteria were: % C4 reduction  $\geq 20$  AND % nuclei  $\geq 90$ , resulting in  $n=11$  signatures. These signatures were then manually grouped according to the compounds' canonical mechanism of action (MoA), resulting in two groups. Group I contained exclusively bromodomain inhibitors and Group II contained compounds

whose targets include p97, AKT, and PLA. Contrastingly, we identified the C4-CMap signatures corresponding to un-interesting effects on C4 and/or cell fitness using the criteria of % C4 reduction < 10 OR % nuclei < 85, resulting in n=34 signatures. We then assessed the frequency with which each TS signature connected to the C4-CMap signatures in Groups I and II as well as to the un-interesting C4-CMap signatures, using a threshold of  $\tau_{\text{summary}} \geq 90$ . C4 preferential connectors were those that frequently connected to the C4-reducing signatures and infrequently to the un-interesting signatures.

## References

- Bakken, T.E., Jorstad, N.L., Hu, Q., Lake, B.B., Tian, W., Kalmbach, B.E., Crow, M., Hodge, R.D., Krienen, F.M., Sorensen, S.A., et al. (2021). Comparative cellular analysis of motor cortex in human, marmoset and mouse. *Nature* 598, 111–119. <https://doi.org/10.1038/s41586-021-03465-8>.
- Bhaduri, A., Sandoval-Espinosa, C., Otero-Garcia, M., Oh, I., Yin, R., Eze, U.C., Nowakowski, T.J., and Kriegstein, A.R. (2021). An atlas of cortical arealization identifies dynamic molecular signatures. *Nature* 598, 200–204. <https://doi.org/10.1038/s41586-021-03910-8>.
- Hafemeister, C., and Satija, R. (2019). Normalization and variance stabilization of single-cell RNA-seq data using regularized negative binomial regression. *Genome Biol.* 20, 296. <https://doi.org/10.1186/s13059-019-1874-1>.
- Hazelbaker, D.Z., Beccard, A., Bara, A.M., Dabkowski, N., Messana, A., Mazzucato, P., Lam, D., Manning, D., Eggan, K., and Barrett, L.E. (2017). A scaled framework for CRISPR editing of human pluripotent stem cells to study psychiatric disease. *Stem Cell Rep.* 9, 1315–1327. <https://doi.org/10.1016/j.stemcr.2017.09.006>.
- Limone, F., Mordes, D.A., Couto, A., Pietilainen, O., Joseph, B.J., Burberry, A., Mitchell, J.M., Ghosh, S., Meyer, D., Therrien, M., et al. (2021). Single-nucleus sequencing reveals enriched expression of genetic risk factors sensitises Motor Neurons to degeneration in ALS. Preprint at bioRxiv. <https://doi.org/10.1101/2021.07.12.452054>.
- Nehme, R., Zuccaro, E., Ghosh, S.D., Li, C., Sherwood, J.L., Pietilainen, O., Barrett, L.E., Limone, F., Worringer, K.A., Kommineni, S., et al. (2018). Combining NGN2

programming with developmental patterning generates human excitatory neurons with NMDAR-mediated synaptic transmission. *Cell Rep.* 23, 2509–2523. <https://doi.org/10.1016/j.celrep.2018.04.066>.

Pfaffl, M.W. (2001). A new mathematical model for relative quantification in real-time RT-PCR. *Nucleic Acids Res.* 29, e45. <https://doi.org/10.1093/nar/29.9.e45>.

Polioudakis, D., de la Torre-Ubieta, L., Langerman, J., Elkins, A.G., Shi, X., Stein, J.L., Vuong, C.K., Nichterwitz, S., Gevorgian, M., Opland, C.K., et al. (2019). A single-cell transcriptomic atlas of human neocortical development during mid-gestation. *Neuron* 103, 785–801.e8. <https://doi.org/10.1016/j.neuron.2019.06.011>.

Stuart, T., Butler, A., Hoffman, P., Hafemeister, C., Papalexi, E., Mauck, W.M., 3rd, Hao, Y., Stoeckius, M., Smibert, P., and Satija, R. (2019). Comprehensive integration of single-cell data. *Cell* 177, 1888–1902.e21. <https://doi.org/10.1016/j.cell.2019.05.031>.

Zhang, Y., Pak, C., Han, Y., Ahlenius, H., Zhang, Z., Chanda, S., Marro, S., Patzke, C., Acuna, C., Covy, J., et al. (2013). Rapid single-step induction of functional neurons from human pluripotent stem cells. *Neuron* 78, 785–798. <https://doi.org/10.1016/j.neuron.2013.05.029>.
